# Supplementary material for: Ucl fimbriae regulation and glycan receptor specificity contribute to gut colonisation by extra-intestinal pathogenic Escherichia coli
Source: PubMed Central journal article supplement (PMC9236248; doi:10.1371/journal.ppat.1010582), 2022-06-14
Supplement: ppat.1010582.s001.pdf [file ppat.1010582.s001.pdf]

# 1 **Supplementary Information**

2

## 3 **Supplementary Methods**

4 **DNA manipulation and genetic techniques.** Oligonucleotides were synthesized by Integrated DNA  
5 Technologies. Plasmid DNA was isolated using the QIAprep Spin Miniprep kit (Qiagen).  
6 Chromosomal DNA was purified using the Wizard Genomic DNA Purification Kit (Promega). PCR  
7 amplification was performed using KAPA HiFi polymerase (Kapa Biosystems). PCR products and  
8 other DNA fragments were purified using the QIAquick PCR Purification kit or the QIAquick Gel  
9 Extraction kit (Qiagen). Restriction endonucleases, T4 polynucleotide kinase, T4 ligase and T4  
10 polymerase treatment were performed following the manufacturer's recommendations (New England  
11 Biolabs). Nucleic acid quantification was performed using a Nano-Drop 2000 Spectrophotometer  
12 (Thermo Scientific). DNA sequencing was performed using Big Dye Terminator Sequencing v3.1  
13 Cycle Sequencing (Applied Biosystems) at the Australian Equine Genomic Research Centre  
14 (AEGRC), University of Queensland.

15 **Bioinformatic analysis.** An *E. coli* genome database was generated by downloading up to 100  
16 randomly selected sequence assemblies from each of the top 83 *E. coli* sequence types in the *E. coli*  
17 collection on EnteroBase ([www.enterobase.warwick.ac.uk](http://www.enterobase.warwick.ac.uk)), a large publicly available  
18 *Enterobacteriaceae* genome sequence database [1]. This resulted in a collection of 8,247 assemblies  
19 (downloaded in January 2019) that we refer to as the 83ST database. The presence of the individual  
20 *uclA-B-C-D* genes in each genome was assessed by tblastn, using the amino acid sequence as a query,  
21 and employing a cut-off at 70 % identity and 95 % coverage. The nucleotide sequence of each gene  
22 in each genome was extracted using blastdbcmd and curated manually for false-positive hits. All  
23 alignments were constructed using ClustalO v1.2.4 [2] with default settings. Maximum-likelihood  
24 trees were produced with IQTree v1.6.8 using ModelFinder with default settings and supported by a  
25 bootstrap value of 100 [3]. Trees and metadata were visualised in Evolview [4].

26 **Genetic mutagenesis of bacteria.** Gene disruption mutants were generated using  $\lambda$ -Red  
27 recombinase-mediated homologous recombination as described previously [5]. Mutant strains  
28 F11*ucl*, UTI89*ucl*, S77E*Cucl* and HVM1299*ucl* were generated via a previously described three-way  
29 PCR procedure [6] to amplify a chloramphenicol (*cm*) resistance cassette from pKD3 with a 500-bp

30 homology region to the *ucl* genes. UTI89*lacI-Z* was generated by amplifying the *gfp-cm* cassette with  
31 a 700-bp homology region using primers 4057 (5'- tcgtcttcacatcctgctcttc) and 4058 (5'-  
32 gctaaatgccgaatggttg), and the chloramphenicol resistance cassette was subsequently removed using  
33 the FLP flippase-encoding pCP20 [5]. Single-nucleotide switching of F11 and UTI to F11-*PucI*<sup>T-78G</sup>  
34 and UTI89-*PucI*<sup>G-78T</sup> was performed using pORTMAGE vectors as described previously [7].

35 **Protein preparation, immunoblotting and whole-cell ELISA.** Strains to be assessed were grown  
36 overnight in LB broth, supplemented with the necessary antibiotics. Whole-cell lysates were prepared  
37 by centrifuging 1 ml of overnight cultures standardised to OD<sub>600nm</sub> = 1.0. Cell pellets were  
38 resuspended in 40 µl water and 5 µl of 2 M HCl and boiled for 10 min before being neutralised with  
39 5 µl of 2 M NaOH, followed by adding 50 µl of 2×SDS loading buffer (100 mM Tris-HCl, 4 % w/v  
40 SDS, 20 % v/v glycerol, 0.2 % w/v bromophenol blue, pH 6.8). Samples were boiled for 10 min,  
41 prior to electrophoresis; a volume of 10 µl was routinely analysed. SDS-PAGE and transfer of  
42 proteins to a PVDF membrane for western-blot analysis was performed as described previously [8].  
43 Rabbit polyclonal antibody generated against UclA, UclD or UcaD was utilised as primary antibody  
44 and detected with commercially purchased alkaline phosphatase conjugated anti-rabbit antibodies  
45 (Sigma Aldrich). SIGMAFAST BCIP/NBT (Sigma-Aldrich) were used as the substrate for detection.  
46 Western blots were scanned using the Bio-Rad GS-800 calibrated imaging densitometer.

47 To detect Ucl surface expression, cells were suspended in 100 mM sodium carbonate (pH 9.5) and  
48 standardised to an OD<sub>600</sub> of 1. 100 µl of culture was used to coat each well of a MaxiSorp 96-well  
49 ELISA plate (Thermo Fisher 44-2404-21) overnight at 4 °C. Wells were blocked with 5 % skim milk  
50 in PBS for 1 hour at room temperature. Antibody incubations were performed in 100 µl PBS with  
51 0.05 % Tween-20 for 1 hour at room temperature. Ucl fimbriae were probed with α-UclA, while α-  
52 *E. coli* (Life Research B65001R) was used as a cell-loading control, and secondary antibody was α-  
53 rabbit IgG, AP conjugated (Sigma A3687). All wash steps were performed three times with 250 µl  
54 PBS with 0.05 % Tween-20. The reaction was developed with 100 µl of substrate pNPP (Sigma  
55 P7998) in the absence of light and optical density was measured at 420 nm after 30 minutes.

56 **β-galactosidase assay.** β-galactosidase assays were performed essentially as described previously  
57 [9]. Briefly, strains to be assessed were grown overnight in LB broth, supplemented with the  
58 necessary antibiotics. Cultures were diluted in Z buffer (60 mM Na<sub>2</sub>HPO<sub>4</sub>, 40 mM NaH<sub>2</sub>PO<sub>4</sub>, 50 mM  
59 β-mercaptoethanol, 10 mM KCl, 1 mM MgSO<sub>4</sub>, pH 7) with 0.004 % SDS and 16 % chloroform  
60 added. Samples were vortexed and incubated at 28 °C to permeabilise the cells. The substrate o-  
61 nitrophenyl-β-D-galactopyranoside (ONPG) was added to initiate the reaction, which was

62 subsequently stopped with sodium bicarbonate.  $\beta$ -galactosidase activity was assessed in  
63 quadruplicate for each strain, by measuring the absorbance at 420 nm. All experiments were  
64 performed as three independent replicates. Statistical analysis of  $\beta$ -galactosidase levels between  
65 F11*lacI-Z* and UTI89*lacI-Z* carrying each of the pQF50 construct was performed using an unpaired,  
66 one-way ANOVA and Sidak's multiple comparison test.

67 **Rapid amplification of cDNA ends (5' RACE).** The transcription start site of *ucl* was determined  
68 using 5' RACE (Version 2.0; Invitrogen) [10]. Exponentially growing cells ( $OD_{600nm} = 0.6$ ) were  
69 stabilized with two-volumes of RNAprotect Bacteria Reagent (Qiagen), prior to RNA extraction  
70 using the RNeasy Mini Kit (Qiagen) and treated with rDNase I (Ambion) to remove contaminating  
71 DNA. First-strand cDNA was synthesized and PCR-amplified using the following gene specific  
72 primers: 6973 (5'- ctgagcactattcatacc) and 6974 (5'- gaatggcaaagggtgtcag), following the  
73 manufacturer's specification. Amplified cDNA ends were sequenced to determine the transcription  
74 start site.

75 **Mouse gut colonization assays.** Competitive gut colonization assays were carried out as previously  
76 described, with slight modifications [11, 12]. Seven- to eight-week-old female Specific Pathogen  
77 Free C3H/HeN mice (Charles River Labs) were first inoculated via oral gavage with 100  $\mu$ L of  
78 streptomycin (1000 mg/kg in water) 24 hours prior to introduction of the F11 strains. Bacteria were  
79 grown statically from frozen stocks at 37°C for 24 hours in 250 ml flasks containing 20 ml LB and  
80 then diluted 1:1000 into fresh LB and grown for another 24 hours. Prior to gavage, 6 mL of each  
81 culture was spun down at 8,000  $\times$  g for 8 minutes and pellets were washed twice and then resuspended  
82 in phosphate-buffered saline (PBS). Each mouse was inoculated with 50  $\mu$ L PBS containing a total of  
83  $\sim 5 \times 10^7$  CFU, comprised of a 1:1 mix of F11::kan and F11::cm (control) or F11::kan and F11-*PucI*<sup>T-</sup>  
84 <sup>78G</sup> (cm resistant). At the indicated time points post-inoculation, individual mice were briefly (3 to 10  
85 min) placed into unused takeout boxes for weighing and feces collection. Freshly deposited feces  
86 were recovered and directly added to 1 ml of 0.7 % NaCl, weighed, and set on ice. Fecal pellets were  
87 broken up by homogenization and samples were then briefly centrifuged to pellet any large insoluble  
88 debris. Supernatants were serially diluted and spread onto LB agar plates containing either  
89 chloramphenicol (20  $\mu$ g/ml) or kanamycin (50  $\mu$ g/ml) to select for growth of the relevant bacterial  
90 strains. Plating assays confirmed that the mice contained no endogenous bacteria that were resistant  
91 to chloramphenicol or kanamycin prior to introduction of the ExPEC strains. Mice were housed 3 to  
92 5 per cage and were allowed to eat (irradiated Teklad Global Soy Protein-Free Extruded chow) and  
93 drink antibiotic-free water *ad libitum*. Competitive indices (CI) were calculated as the ratio of the cm

94 resistant over kan resistant bacteria recovered from the feces divided by the ratio of the same strains  
95 within the inoculum.

96 **Cloning, expression and purification of UclD<sup>LD</sup> and UcaD<sup>LD</sup>.** The structures of the lectin domains  
97 of UclD and UcaD were predicted using Phyre (<http://www.sbg.bio.ic.ac.uk/phyre2/html/>) [13]. The  
98 coding sequences for the *uclD* and *ucaD* lectin domains were amplified from *E. coli* strain F11 and  
99 *P. mirabilis* PM54 clinical isolate [14] genomic DNAs. The amplicons were cloned into pET22b,  
100 which encodes a C-terminal His-tag. Epoch Life Science made and confirmed by sequencing the  
101 pET22b::*uclD* and pET22b::*ucaD* constructs.

102 *E. coli* BL21 (DE3) pLys harbouring pET22b::*uclD* and pET22b::*ucaD* were grown at 37 °C in LB  
103 media supplemented with 100 µg/mL ampicillin. Cells were induced at OD<sub>600nm</sub> of 0.5 with 1 mM  
104 IPTG at 37 °C. Periplasmic extractions by cold osmotic shock of cells incubated overnight were  
105 carried out. UclD<sup>LD</sup> and UcaD<sup>LD</sup> were purified using a HiTrap nickel column (GE Healthcare).  
106 Proteins were eluted in a gradient of 0-400 mM imidazole in a buffer containing 20 mM Tris-HCl  
107 (pH 7.5) and 150 mM NaCl. Fractions containing the UclD or UcaD, as judged by SDS-PAGE, were  
108 pooled and dialysed against a buffer containing 20 mM Tris-HCl (pH 7.5) and 150 mM NaCl  
109 overnight at 4 °C. Size-exclusion chromatography (HiPrep 16/60 Sephacryl S-200 HR GE  
110 Healthcare) in 20 mM Tris-HCl (pH 7.5) and 150 mM NaCl was used to further purify UclD and  
111 UcaD, as assessed by SDS-PAGE.

112 **Glycan array analysis.** Glycan array analysis was carried out using methods previously described  
113 [15, 16]. Briefly, 2 µg of UclD and UcaD, in a final volume of 500 µL of array PBS (PBS with 2 mM  
114 MgCl<sub>2</sub> and 2mM CaCl<sub>2</sub>), were pre-complexed with a mouse anti-his antibody and detected with  
115 fluorescent Alexafluor555 secondary and tertiary antibodies in a molar ration of 4:2:1 for 10 mins  
116 prior to application to the array. Slides were previously pre-blocked for 15 mins in array PBS with  
117 0.5 % BSA. Slides were rinsed in PBS and dried by centrifugation. Protein was hybridised to the  
118 array for 15 min at room temperature in the dark. After 15 min, the slide was immersed in array PBS  
119 with 0.2% BSA and washed for 2 min. The slide was then placed in a 50 mL falcon tube and washed  
120 in array PBS for 2 min, before rinsing in clean PBS then drying by centrifugation at 200 x g for 5  
121 min. The array was scanned by a ProScan Array scanner, and the results analysed by ScanArray  
122 Express software program. Binding was classified as RFU (relative fluorescence units) structure  
123 reported as positive had a value above mean background (defined as mean background plus 3 standard  
124 deviations), and had a P value of < 0.005.

125 **SPR analysis.** SPR analysis was carried out using a Biacore T200 system (Cytivia) as previously  
126 described [15] with minor modifications. Briefly, UclD and UcaD were immobilized onto flow cells  
127 of a CM5 sensor chip using amine coupling at 20  $\mu\text{g}/\text{mL}$  in 10 mM sodium acetate pH 4.0 and at a  
128 flow rate of 5  $\mu\text{L}/\text{min}$  for 10 minutes. Glycans were chosen based on positive glycan array results for  
129 each of the proteins with each glycan run across a dilution range starting at a maximum concentration  
130 of 100  $\mu\text{M}$  and minimum concentrations tested being 1.6 nM using single cycle kinetics. Results were  
131 analysed using the Biacore T200 evaluation software.

### 132 **Crystallization and crystal structure determination.**

133 **UclD<sup>LD</sup>:** UclD<sup>LD</sup> crystals were produced using the hanging drop method, with drops containing 1  $\mu\text{L}$   
134 of protein (10 mg/mL) and 1  $\mu\text{L}$  of well solution (20-25% w/v PEG 3350, 0.1 M Bis-Tris propane  
135 pH 6.5, 0.2 M sodium iodide). The crystals appeared within 1-5 days. The crystals were cryoprotected  
136 in glycerol (80% well solution and 20% (v/v) glycerol) before flash-cooling in liquid nitrogen. X-ray  
137 diffraction data were collected from a single crystal at the Australian Synchrotron MX1 beamline,  
138 using a wavelength of 0.9537 Å. Data collection was performed using Blu-Ice software [17], indexed  
139 and integrated using MOSFLM and scaled with AIMLESS within the CCP4 suite [18]. Molecular  
140 replacement was initially attempted using several published fimbrial adhesin structures as templates,  
141 but a solution could not be obtained. Because the crystallisation condition contained sodium iodide,  
142 we determined the UclD<sup>LD</sup> structure by SAD phasing using the CRANK2 [19] pipeline of the CCP4  
143 suite and a dataset (2.85 Å resolution) collected at wavelength of 1.3776 Å, where the anomalous  
144 scattering properties of iodide are still significant. Iodine atoms were located by SHELXD [20], and  
145 automatic model building was performed using Buccaneer [21] and Refmac [22]. The higher  
146 resolution UclD<sup>LD</sup> structure was subsequently solved by molecular replacement using PHASER [23].  
147 The model was refined using Phenix [24], with iterative model building carried out between rounds  
148 of refinement using Coot [25]. Structure validation was performed using MolProbity [26]. The  
149 structure was refined to final  $R_{\text{work}}/R_{\text{free}}$  values of 24.8%/30.6% (Table A in S1 Text). The moderate  
150 quality of the UclD<sup>LD</sup> dataset ( $R_{\text{meas}}$  of 27.9%, Table A in S1 Text) is a likely reason for the high  $R_{\text{free}}$   
151 value. The final UclD<sup>LD</sup> model contains residues 21-215. Electron density was not observed for  
152 residues 43-48, suggesting that these regions have a disordered or flexible conformation in the  
153 crystals. The coordinates and structure factors have been deposited in the PDB with ID 7MZP.

154 **UcaD<sup>LD</sup>:** UcaD<sup>LD</sup> crystals were produced using the hanging drop method with drops containing 1  $\mu\text{L}$   
155 of protein (8-16 mg/mL) and 1  $\mu\text{L}$  of well solution (0.1 M sodium citrate buffer pH 4.5-5.5, 2-3 M  
156 NaCl). The crystals appeared within 3-5 days. The crystals were cryoprotected in Paratone-N, before

157 flash-cooling in liquid nitrogen. X-ray diffraction data were collected from a single crystal at the  
158 Australian Synchrotron MX2 beamline, using a wavelength of 0.9537 Å. Data collection was  
159 performed using Blu-Ice software [17], indexed and integrated using MOSFLM and scaled with  
160 AIMLESS within the CCP4 suite [18]. The structure was solved by molecular replacement using  
161 PHASER [23] and UclD<sup>LD</sup> as the template. The model was refined using Phenix [24] and structure  
162 validation was performed using MolProbity [26]. The structure was refined to final R<sub>work</sub>/R<sub>free</sub> values  
163 of 16.9%/19.2%, respectively (Table A in S1 Text). The final UcaD<sup>LD</sup> model contains residues 21-  
164 217. Electron density was not observed for residues 44-47, suggesting that these regions have a  
165 disordered or flexible conformation in the crystals. Coordinates and structure factors have been  
166 deposited in the PDB with ID 7MZO.

167 **UcaD<sup>LD</sup>:monosaccharide complexes:** Pre-formed UcaD<sup>LD</sup> and UclD<sup>LD</sup> crystals were soaked with  
168 0.1-0.2 M of the monosaccharides Fuc, Glc, Gal, GlcNAc, GalNAc or Neu5Ac for 48 hours in the  
169 crystallisation solution (0.1 M sodium citrate buffer pH 4.5-5.5, 2-3 M NaCl). The crystals were  
170 cryoprotected in Paratone-N and flash-cooled at 100 K. X-ray diffraction data were collected from  
171 single crystals on the MX2 beamline at the Australian Synchrotron, using a wavelength of 0.9537 Å.  
172 The data-sets was processed using either MOSFLM (Gal complex), or XDS (Fuc and Glc complexes)  
173 [27] and scaled using AIMLESS in the CCP4 suite [18]. The structures were solved by molecular  
174 replacement using PHASER [23] and ligand-free UcaD<sup>LD</sup> as the template. The models were refined  
175 using Phenix [24], and structure validations were performed using MolProbity [26]. Coordinates and  
176 structure factors have been deposited in the PDB with IDs 7MZQ (Fuc complex), 7MZR (Glc  
177 complex), and 7MZS (Gal complex).

178 **Molecular docking and molecular dynamics simulations.** The initial structure for MD simulations  
179 was obtained by molecular docking of lacto-N-fucopentose VI with AutoDock Vina [28], as  
180 implemented in the YASARA molecular modelling package (Ver. 16.46) [29]. A grid box covering  
181 the entire monosaccharide-binding site and surroundings was used to place lacto-N-fucopentose VI.  
182 The docked structure with the best superimposition between the fucose moiety of lacto-N-  
183 fucopentose VI and the fucose molecule observed in the UcaD<sup>LD</sup>:Fuc complex was then subjected to  
184 further optimization by a 40 ns MD simulation using the AMBER force-field implemented in the  
185 YASARA software suite [29]. A representative energy-minimised snapshot from the MD trajectory  
186 was used for the analyses.

187

188 **Supplementary Figures**

189

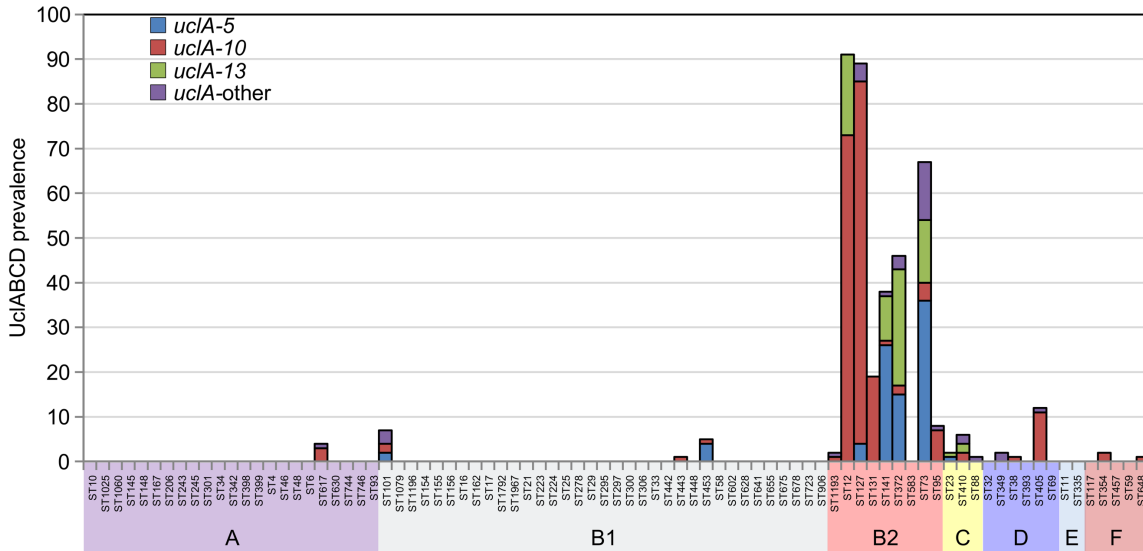

199

200

201

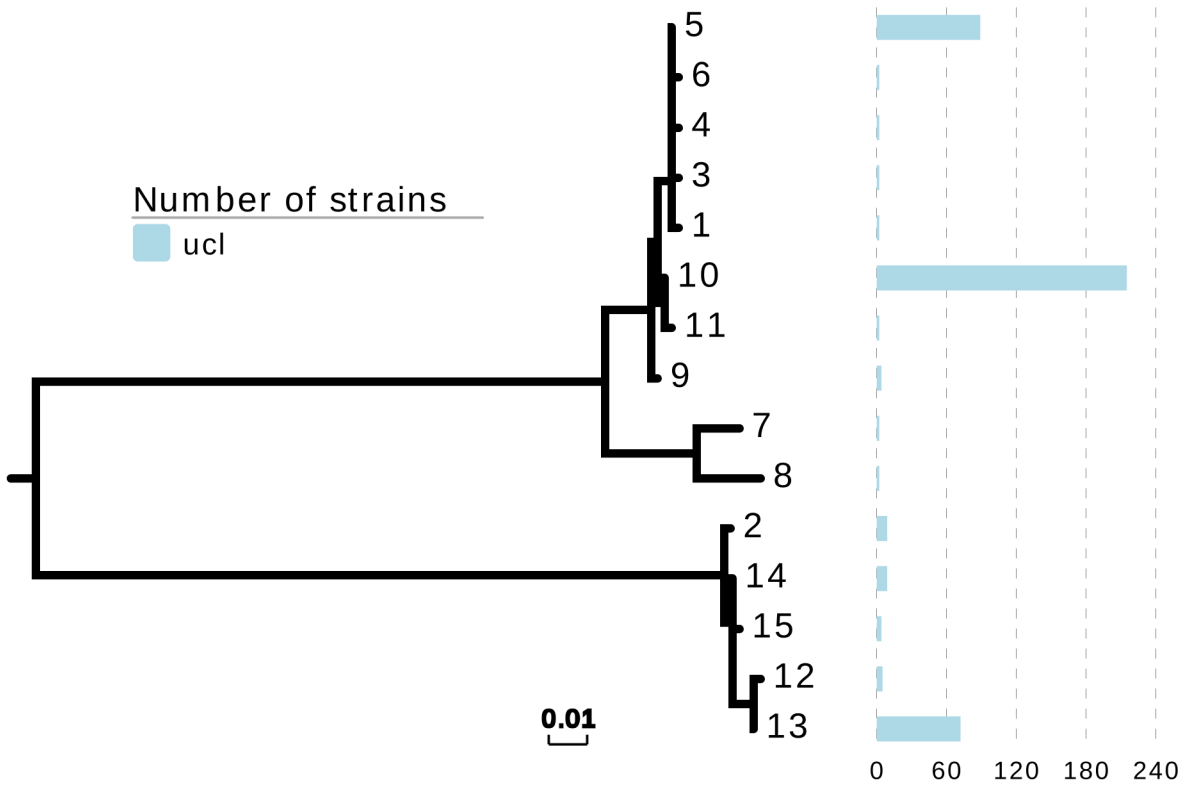

202

203 **Fig B.** Maximum likelihood phylogeny of *uclA* variants found in the 83ST database, with the number  
204 of each *uclA* variant indicated in the bar graph. A total of 15 *uclA* allelic variants that differed by up  
205 to 27% at the nucleotide level were identified. The most common allelic variant was *uclA*-10  
206 (212/404; 52.5%), followed by *uclA*-5 (88/404; 21.8%) and *uclA*-13 (71/363; 17.6%); other allelic  
207 variants were infrequent.

208

209



210  
211  
212  
213  
214  
215

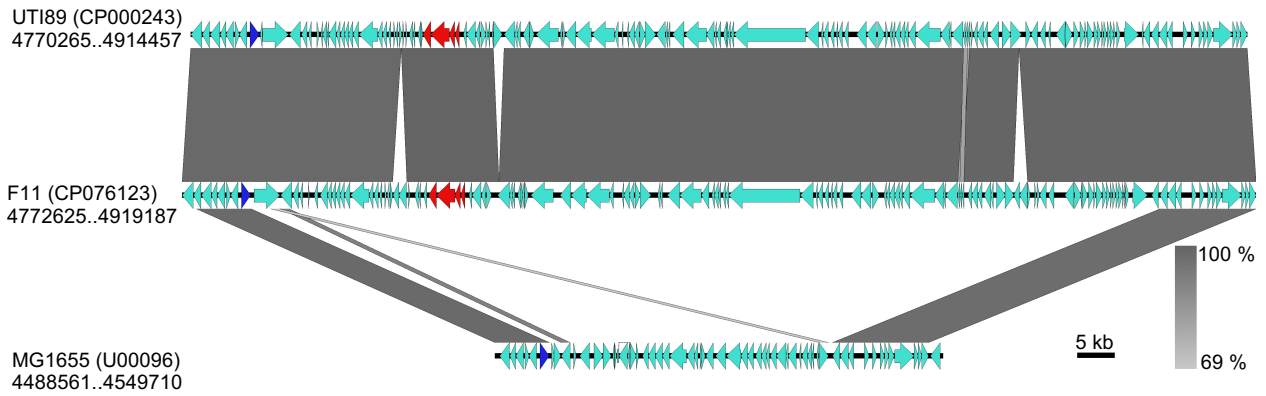

216  
217  
218  
219  
220  
221  
222

223 **Fig C.** Pair-wise sequence comparison of GI-*leuX* region of UTI89 (top), F11 (middle) and MG1655  
224 (bottom). The integrase gene adjacent to tRNA-*leuX* is coloured blue, *uclABCD* are coloured red. The  
225 grey regions connecting the genomes represent blastn output with the percent of conservation shown  
226 in the scale bar.

227  
228  
229

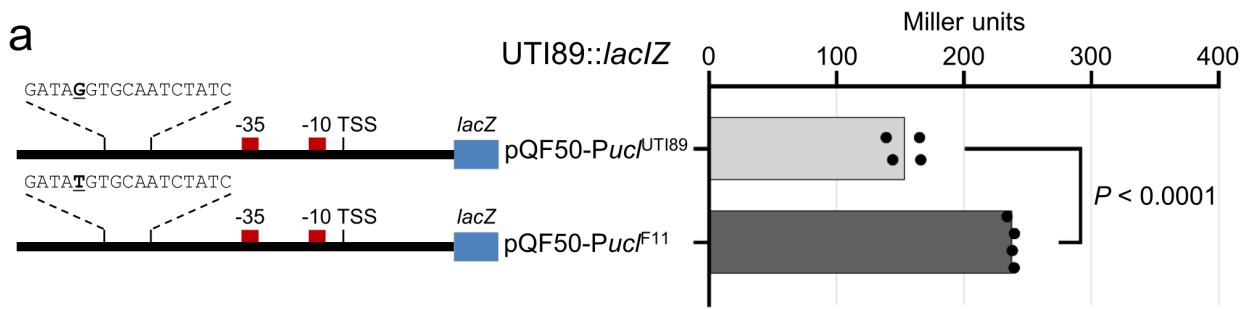

**b** *PucI<sub>F11</sub>*

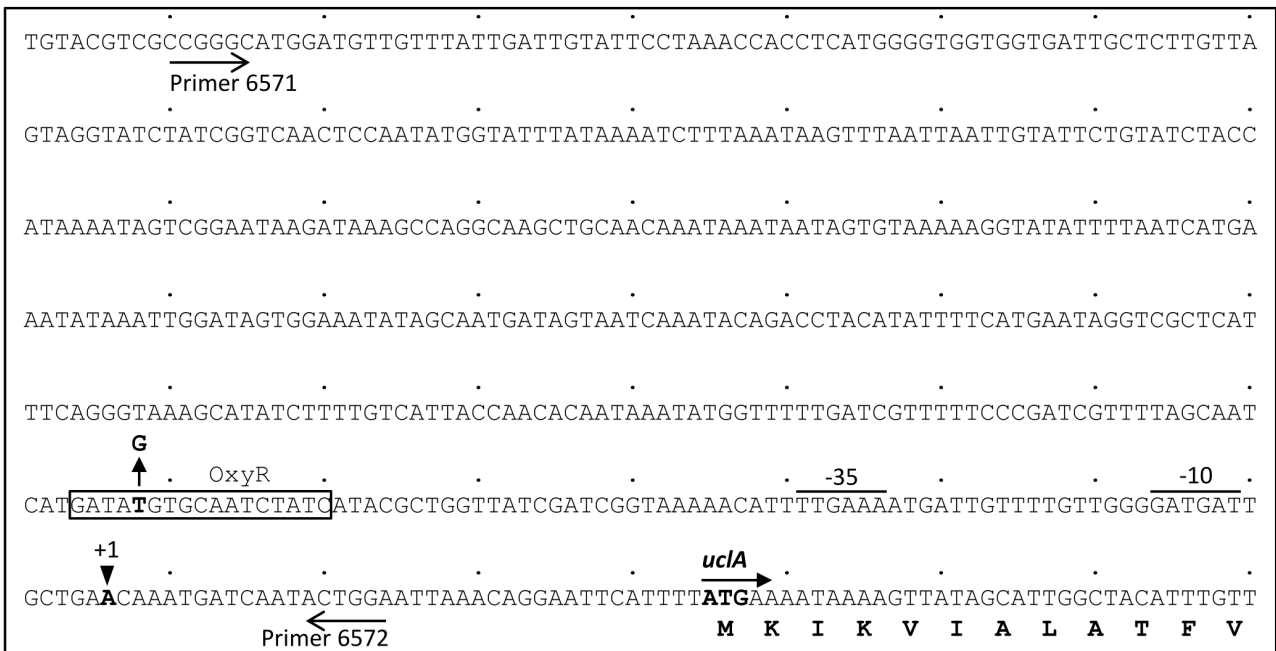

231

232 **Fig D. Analysis of the *ucl* promoter.** a) Left, schematic diagram of the *ucl* promoter region from  
 233 F11 and UTI89 cloned in the reporter plasmid pQF50. Indicated are the TSS, -10 and -35 promoter  
 234 elements, and OxyR binding site. Right,  $\beta$ -galactosidase activity (measured in Miller units) for each  
 235 *PucI-lacZ* fusion construct in UTI89*lacZ*. Plasmid pQF50-*PucI<sup>F11</sup>-lacZ* possessed a higher  $\beta$ -  
 236 galactosidase activity as compared to pQF50-*PucI<sup>UTI89</sup>-lacZ* ( $p < 0.0001$ ; one-way ANOVA with  
 237 Sidak's multiple comparisons test). b) Promoter region of *ucl* operon from F11. The transcription  
 238 start site is indicated as +1, with the predicted -10 and -35 core promoter elements indicated  
 239 accordingly. Bolded T with an arrow indicates the single nucleotide that differed in F11, where a G  
 240 is present at this position in UTI89, S77EC and HVM1299. The region from F11 and UTI89 cloned  
 241 into the pQF50 *lacZ* reporter plasmid is indicated by arrows denoting the 5' ends of primers 6571-  
 242 6572.

243

244

245

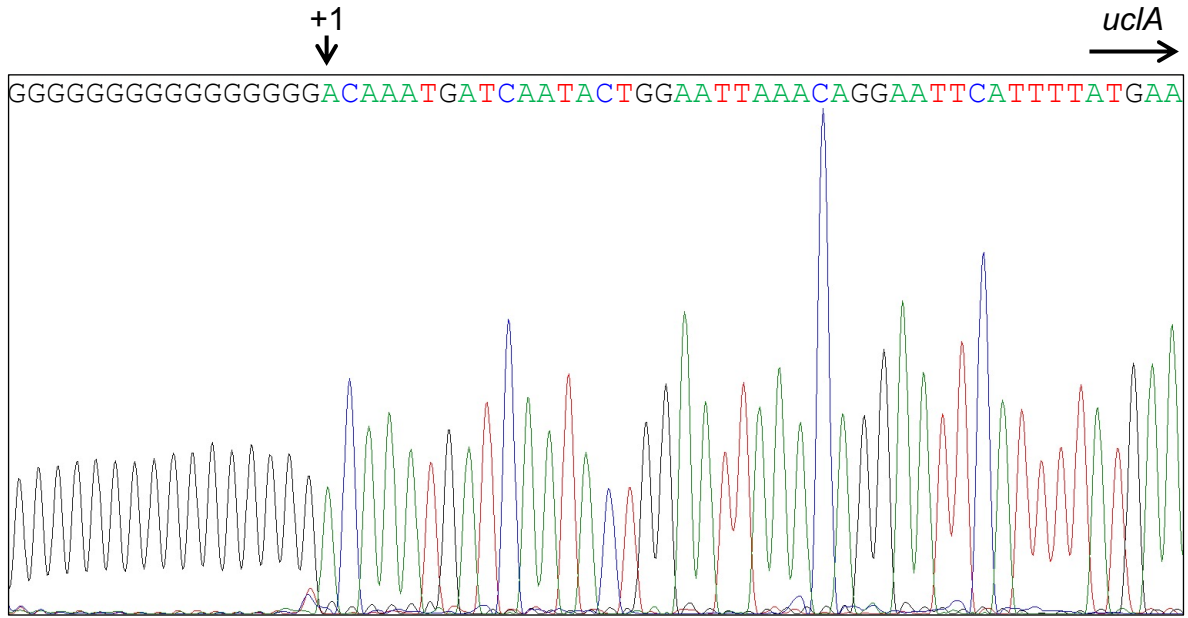

246

247

248 **Fig E. 5' RACE of *uclA* to map the transcription start site.** Top: sequence, indicating the ATG  
249 start codon of the *uclA* gene and the +1 transcription start site. Bottom: sequence chromatogram.

250

251

252

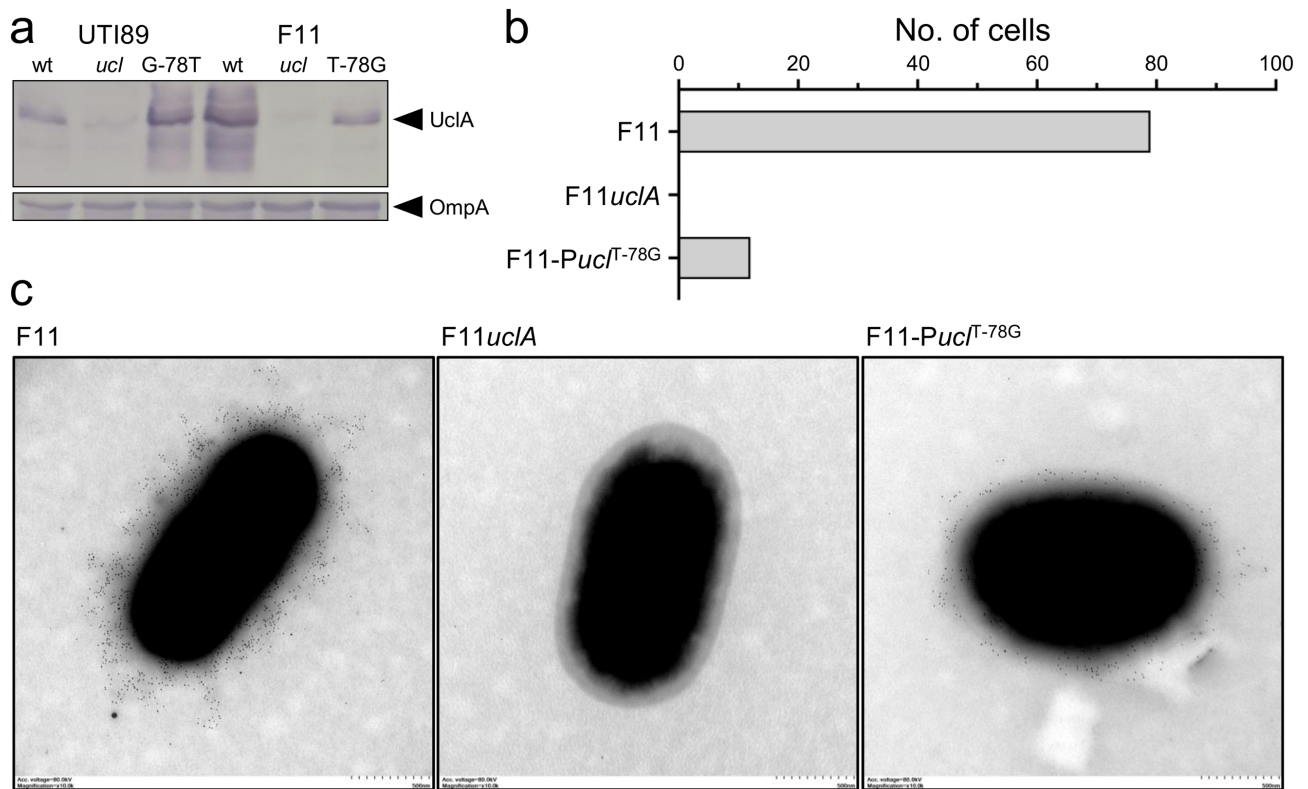

254

255 **Fig F.** a) Whole-cell lysate western-blot analysis of F11<sup>T-78G</sup> and UTI89<sup>G-78T</sup>. Higher expression of  
 256 UclA was observed in UTI89<sup>G-78T</sup> mutants and lower in abundance in F11<sup>T-78G</sup>, compared to that of  
 257 their wild-type strains. b) Qualitative analysis of 100 cells assessed for Ucl fimbriation using  $\alpha$ -UclA  
 258 immuno-gold labelling. c) Representative UclA immunogold-labelled TEM images for F11,  
 259 F11 $\Delta$ *uclA* and F11-*PucI*<sup>T-78G</sup>.

260

261

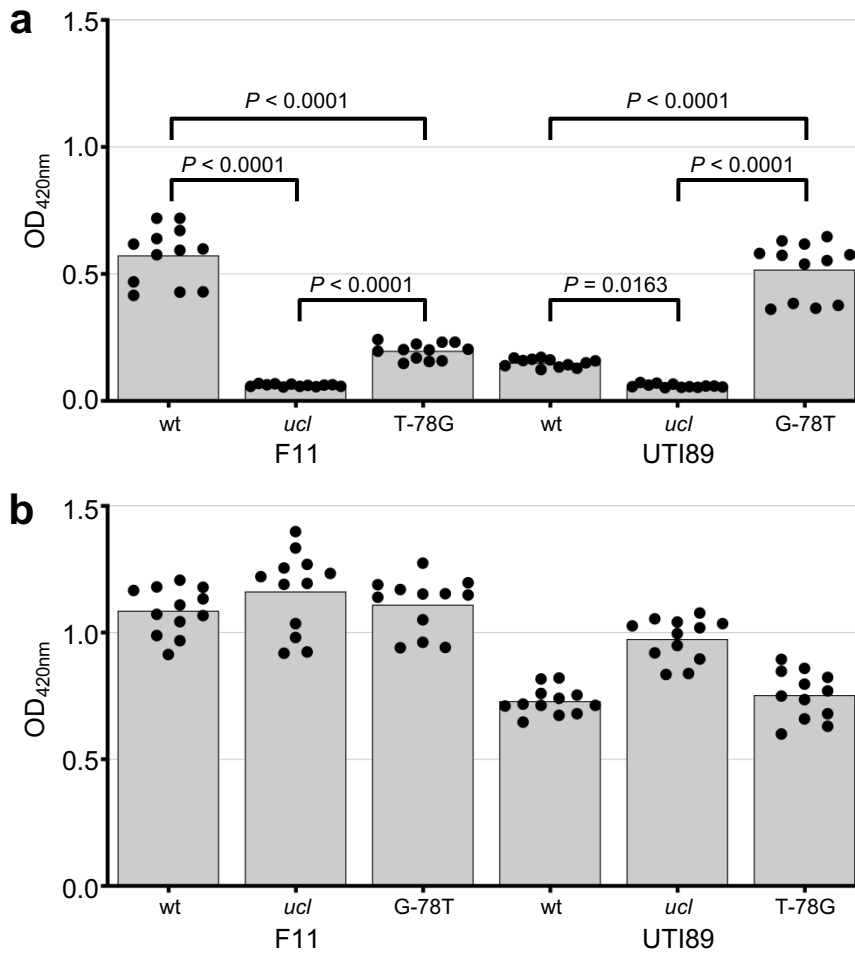

263

264 **Fig G. Anti UclA whole-cell ELISA.** a) Whole-cell ELISA demonstrating expression of Ucl fimbriae  
 265 on wild-type F11 (wt), F11 $\Delta$ *ucl* (*ucl*) and F11-*Pucl*<sup>T-78G</sup> (T-78G), as well as wild-type UTI89 (wt),  
 266 UTI89 $\Delta$ *ucl* (*ucl*) and UTI89-*Pucl*<sup>G-78T</sup>. Ucl fimbriae were detected using UclA-specific polyclonal  
 267 antibody. b) Control whole cell ELISA of wild-type F11 (wt), F11 $\Delta$ *ucl* (*ucl*) and F11-*Pucl*<sup>T-78G</sup> (T-  
 268 78G), as well as wild-type UTI89 (wt), UTI89 $\Delta$ *ucl* (*ucl*) and UTI89-*Pucl*<sup>G-78T</sup> employing a general  
 269 *E. coli* antibody (Life Research B65001R). The black dots show individual measurements for four  
 270 technical replicates from three biological replicates (n=12); the grey bar indicates the mean. Statistical  
 271 analyses were performed by one-way ANOVA with Sidak's multiple comparisons test.

272

273

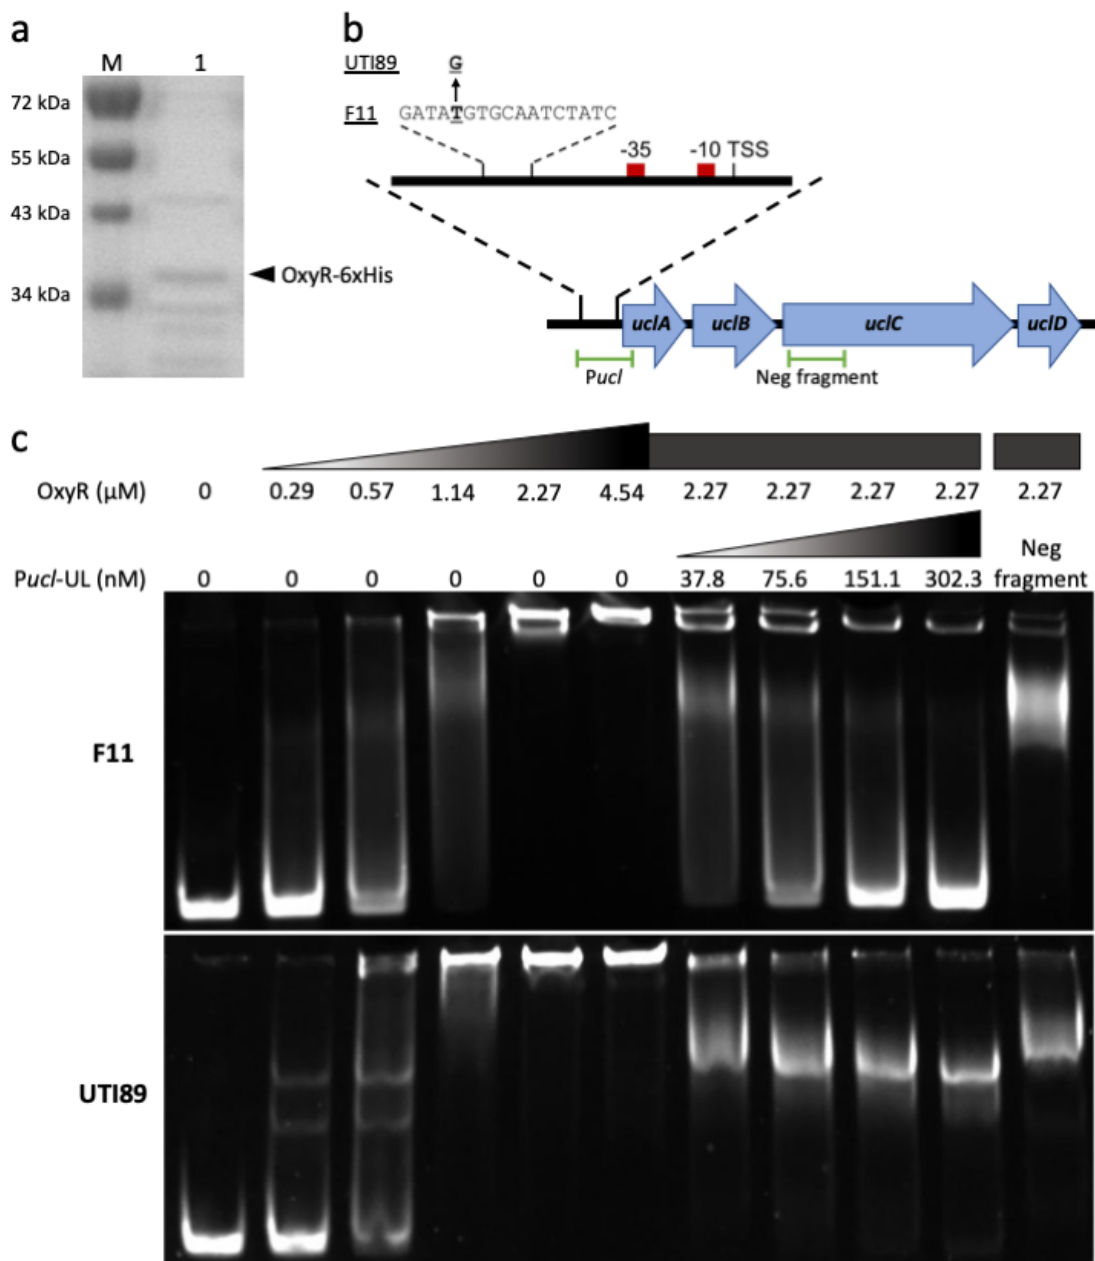

274

275 **Fig H. Binding of OxyR to the *ucl* promoter region (*Pucl*).** a, Coomassie-stained SDS-PAGE of  
 276 OxyR-6xHis. Lane M: PageRuler Prestained Protein Ladder (Life Technologies, catalogue no.  
 277 26616), Lane 2: Nickel-affinity purified OxyR-6xHis. b, Schematic diagram of the *uclABCD* operon,  
 278 indicating the transcription start site (TSS), -10 and -35 promoter region, and OxyR binding sequence  
 279 containing the T<sup>(-78)</sup> in F11 and the G<sup>(-78)</sup> in UTI89. Also indicated are the 261 bp *Pucl* PCR fragment  
 280 and the 240 bp *uclC* PCR fragment (negative control) used in the gel shift assay. c, Electrophoretic  
 281 mobility shift assay of the Cy3-*Pucl*<sup>-78T</sup> (top) and Cy3-*Pucl*<sup>-78G</sup> (bottom) fragments with OxyR and  
 282 increasing concentrations of unlabelled competitor (*Pucl*-UL) DNA.

283

284

285

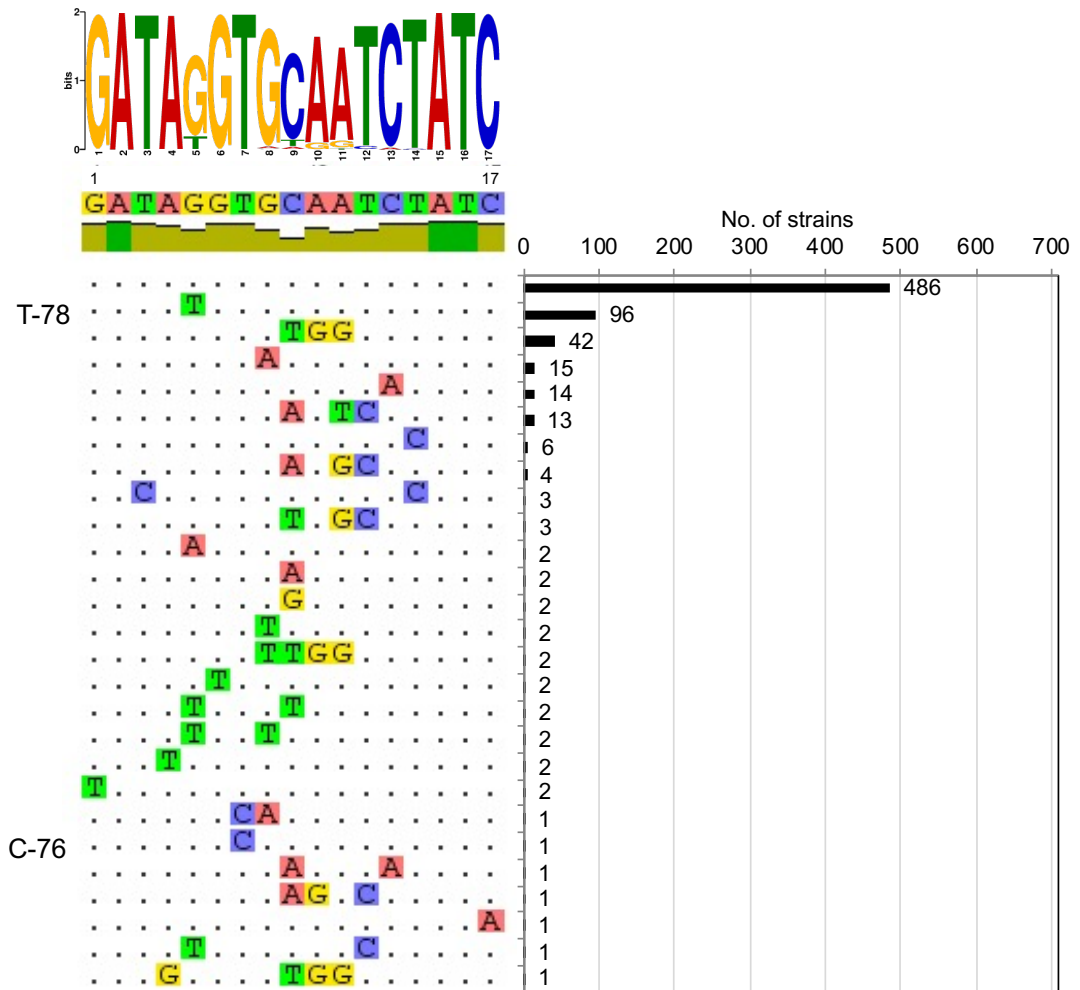

286

287 **Fig I. Conservation of the *Pucl* OxyR binding site in ST127.** A total of 845 genomes from ST127  
 288 strains on Enterobase were downloaded, 698 of which were positive for the Ucl fimbriae genes. The  
 289 OxyR binding site was extracted from each *Pucl* sequence and aligned to generate the DNA logo  
 290 shown at the top of the figure. Twenty-seven unique OxyR binding sites were identified, with  
 291 nucleotide sequence changes shown below the consensus sequence. The number of times each unique  
 292 sequence was identified in the dataset is indicated. The OxyR binding site consensus sequence was  
 293 found most frequently (n=486), while the F11 T-78G SNP was also common (n=96). In total, 31% of  
 294 the *Pucl* OxyR binding sites contained at least one SNP compared to the consensus sequence, with  
 295 the F11 T-78G SNP most prevalent (14%). Sequences containing the G-78T and T-76C are indicated.

296

297

298

299

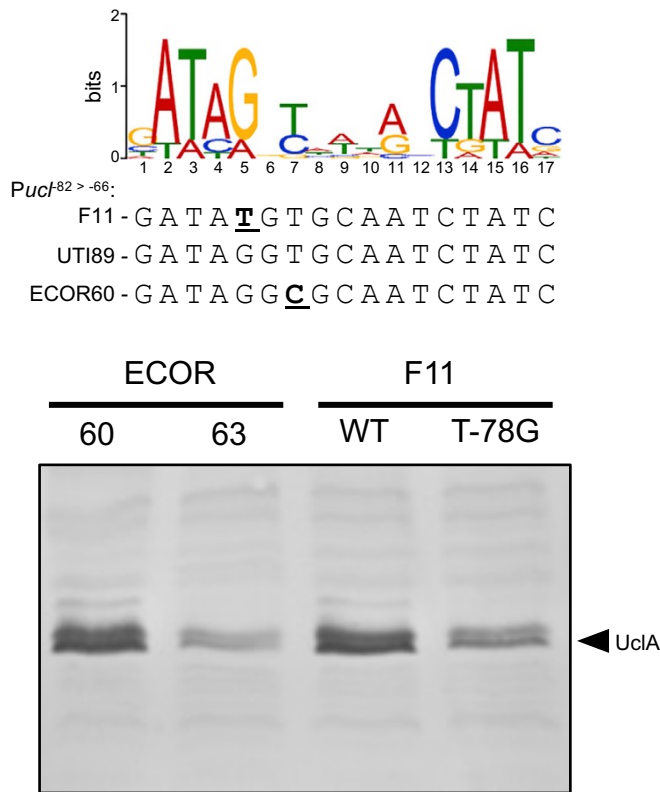

300

301

302 **Fig J. UclA expression is increased in ECOR60.** a) OxyR binding site sequences from UTI89  
303 (consensus), F11 and ECOR60, highlighting the C-76T nucleotide sequence change in ECOR60. b)  
304 Whole-cell lysate western-blot analysis of ECOR60, ECOR63, F11 (WT) and F11-*PucI*<sup>T-78G</sup>  
305 employing a UclA-specific antibody. Higher expression of UclA was observed in ECOR60 and F11  
306 (WT) compared to ECOR63 and F11-*PucI*<sup>T-78G</sup>. The promoter region of the *ucl* operon from ECOR63  
307 and UTI89 is identical.

308



309

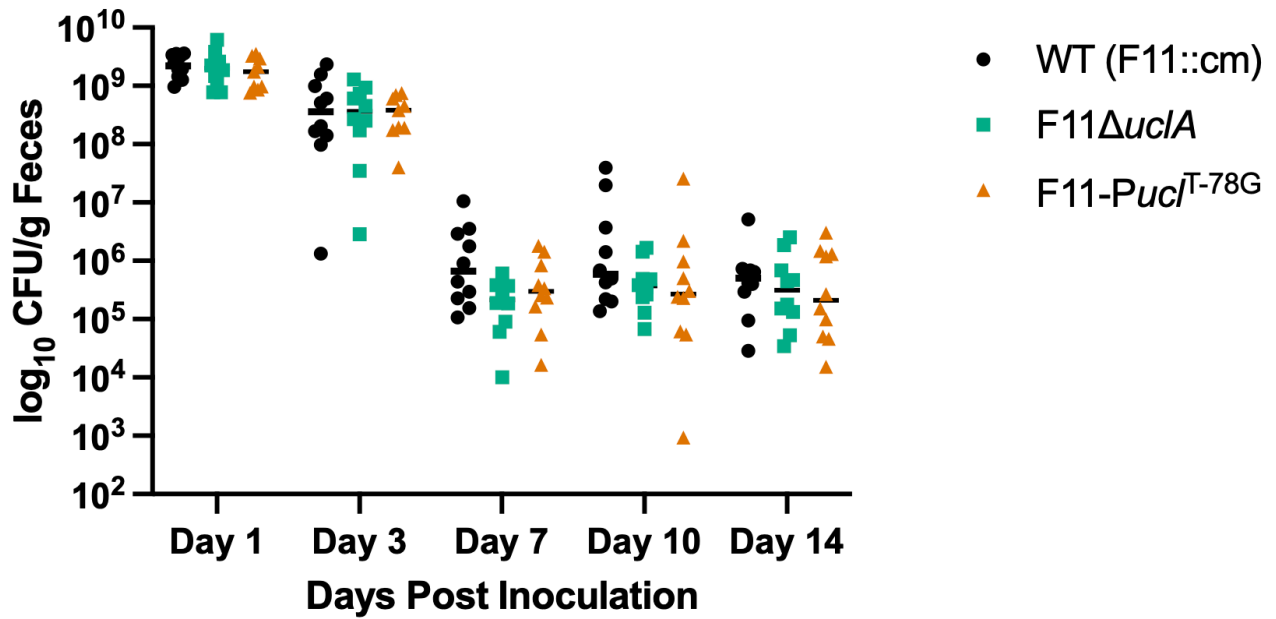

310

311 **Fig K. Ucl fimbriae do not impact colonisation of the mouse gut in single infection experiments.**

312 Mice were inoculated wild-type F11 (tagged with a chloramphenicol resistance cassette; black  
313 circles), F11-PucI<sup>T-78G</sup> (green squares) and an F11 $\Delta$ ucl mutant (orange triangles). Each group  
314 contained 10-11 mice infected and monitored during two independent experiments. Bacterial loads  
315 were assessed over a 2-week period.

316

317

318

319

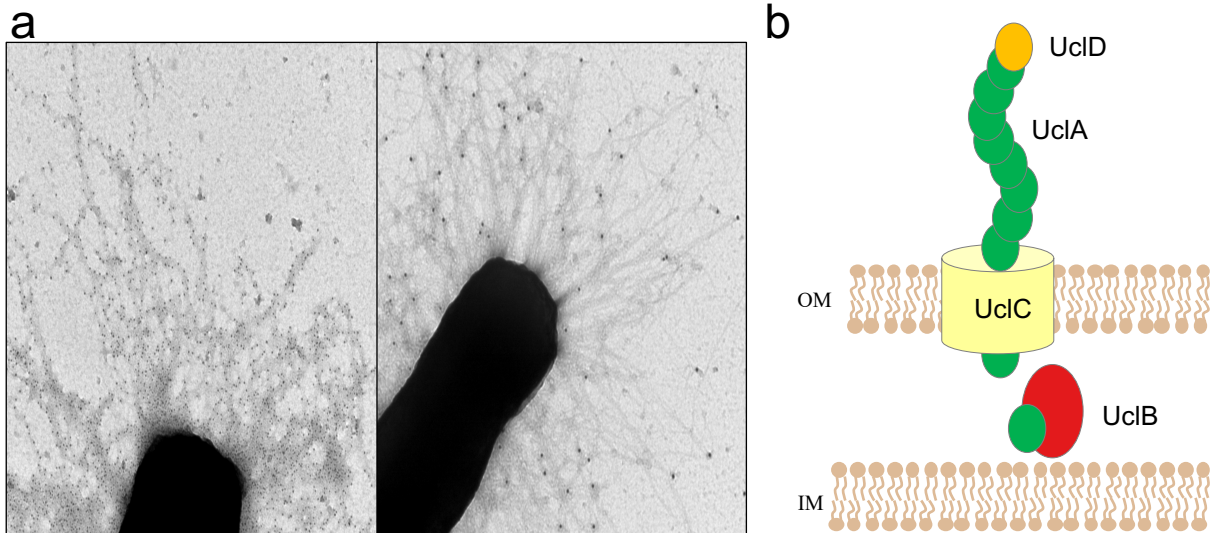

320

321

322 **Fig L. Architecture of Ucl fimbriae demonstrated by co-immunogold labelled electron**  
323 **microscopy.** a) Electron micrograph demonstrating immunogold labelled UclA major subunit (left;  
324 5 nm gold particles) and UclD tip adhesin (right; 10 nm gold particles) of Ucl fimbriae. b) Cartoon  
325 model of Ucl fimbriae architecture, depicting the UclA major subunit repeating protein (green), UclD  
326 tip adhesin (orange), UclC usher (yellow) and UclB chaperone (red). Also labelled are the inner  
327 membrane (IM) and outer membrane (OM) of the cell

328

329

330

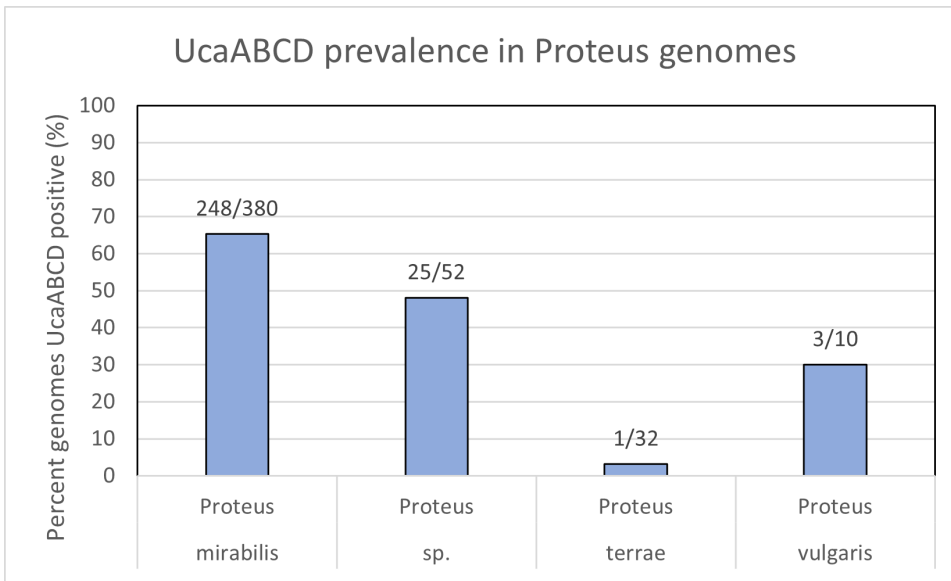

331

332

333 **Fig M. Prevalence of the *uclABCD* genes in *Proteus* species.** Genomes were assessed from the  
334 NCBI database. The analysis was performed using tblastn for UcaA, UcaB, UcaC and UcaD, with a  
335 positive result determined for blast hits with >70% identity and >80% coverage for all four proteins.

336

|                    |                                                                 |                                                        |                                                                 |                                                        |    |
|--------------------|-----------------------------------------------------------------|--------------------------------------------------------|-----------------------------------------------------------------|--------------------------------------------------------|----|
|                    | 1                                                               | 10                                                     | 20                                                              | 30                                                     | 40 |
| Consensus          | <b>M</b> KR <b>I</b> F <b>X</b> <b>I</b> X <b>L</b> X           | <b>L</b> X <b>L</b> L <b>P</b> X <b>L</b> A <b>V</b> A | GA-----                                                         | - <b>N</b> D <b>Y</b> V <b>P</b> S <b>Q</b> I <b>X</b> |    |
| 1. UclD_EEZ6997767 | <b>M</b> KR <b>I</b> F <b>F</b> I <b>P</b> L <b>F</b>           | <b>L</b> I <b>L</b> L <b>P</b> K <b>L</b> A <b>V</b> A | GP-----                                                         | - <b>D</b> D <b>Y</b> V <b>P</b> S <b>Q</b> I <b>A</b> |    |
| 2. UcaD_CAR41289.1 | <b>M</b> KR <b>I</b> F <b>V</b> I <b>L</b> F <b>L</b>           | <b>L</b> T <b>L</b> F <b>P</b> S <b>L</b> A <b>V</b> A | GA-----                                                         | - <b>N</b> D <b>Y</b> V <b>P</b> S <b>P</b> I <b>T</b> |    |
| 3. GafD_Q47341     | <b>M</b> T <b>N</b> F <b>Y</b> K <b>V</b> C <b>L</b> A          | <b>V</b> F <b>I</b> L <b>V</b> C <b>C</b> N <b>I</b> S | HAAVSF IGST                                                     | END <b>V</b> G <b>P</b> S <b>Q</b> S                   |    |
|                    | 50                                                              | 60                                                     | 70                                                              | 80                                                     |    |
| Consensus          | X <b>N</b> T <b>S</b> ---- <b>T</b> L                           | <b>P</b> X <b>V</b> V <b>I</b> G <b>P</b> A <b>D</b> A | <b>H</b> T <b>I</b> Y <b>P</b> R <b>V</b> I <b>G</b> E <b>L</b> | X <b>G</b> T <b>S</b> N <b>Q</b> Y <b>V</b> F-         |    |
| 1. UclD_EEZ6997767 | <b>V</b> N <b>T</b> S---- <b>T</b> L                            | <b>P</b> G <b>V</b> V <b>I</b> G <b>P</b> A <b>D</b> A | <b>H</b> T <b>I</b> Y <b>P</b> R <b>V</b> I <b>G</b> E <b>L</b> | A <b>G</b> T <b>S</b> N <b>Q</b> Y <b>V</b> F-         |    |
| 2. UcaD_CAR41289.1 | <b>I</b> N <b>T</b> S---- <b>T</b> L                            | <b>P</b> V <b>V</b> V <b>I</b> G <b>P</b> A <b>D</b> A | <b>H</b> T <b>I</b> Y <b>P</b> R <b>V</b> I <b>G</b> E <b>L</b> | T <b>G</b> T <b>S</b> N <b>Q</b> Y <b>I</b> F-         |    |
| 3. GafD_Q47341     | <b>Y</b> S <b>S</b> T <b>H</b> A <b>M</b> D <b>N</b> L          | <b>P</b> F <b>V</b> Y-----                             | <b>N</b> T <b>I</b> ----- <b>G</b> Y <b>N</b>                   | I <b>G</b> Y <b>Q</b> N <b>A</b> N <b>V</b> W <b>R</b> |    |
|                    | 90                                                              | 100                                                    | 110                                                             | 120                                                    |    |
| Consensus          | - <b>N</b> G <b>G</b> X <b>X</b> I <b>A</b> L <b>M</b>          | <b>R</b> G <b>K</b> F <b>T</b> P <b>X</b> L <b>P</b> K | <b>I</b> G <b>S</b> I <b>T</b> Y <b>X</b> F <b>X</b> Q          | <b>G</b> N <b>S</b> X <b>X</b> S <b>S</b> D <b>F</b> D |    |
| 1. UclD_EEZ6997767 | - <b>N</b> G <b>G</b> A- <b>I</b> A <b>L</b> M                  | <b>R</b> G <b>K</b> F <b>T</b> P <b>A</b> L <b>P</b> K | <b>I</b> G <b>S</b> I <b>T</b> Y <b>T</b> F <b>H</b> Q          | <b>G</b> N <b>S</b> R <b>D</b> S <b>S</b> D <b>F</b> D |    |
| 2. UcaD_CAR41289.1 | - <b>N</b> G <b>G</b> S <b>L</b> I <b>A</b> L <b>M</b>          | <b>R</b> G <b>K</b> F <b>T</b> P <b>T</b> L <b>P</b> K | <b>I</b> G <b>K</b> I <b>T</b> Y <b>N</b> F <b>R</b> Q          | <b>G</b> N <b>N</b> T <b>Q</b> S <b>S</b> D <b>F</b> D |    |
| 3. GafD_Q47341     | <b>I</b> S <b>G</b> G <b>F</b> C <b>V</b> G <b>L</b> -          | <b>D</b> G <b>K</b> V <b>D</b> -- <b>L</b> P <b>V</b>  | <b>V</b> G <b>S</b> L----- <b>D</b>                             | <b>G</b> Q <b>S</b> I <b>Y</b> G <b>L</b> T <b>E</b> F |    |
|                    | 130                                                             | 140                                                    | 150                                                             | 160                                                    |    |
| Consensus          | <b>I</b> X <b>D</b> X <b>G</b> V <b>X</b> G <b>L</b> G          | <b>I</b> I <b>I</b> G <b>M</b> A <b>G</b> Y <b>W</b> P | A <b>T</b> I <b>P</b> L <b>V</b> P <b>I</b> N <b>S</b> S        | X <b>I</b> Y <b>I</b> D <b>P</b> V <b>X</b> A <b>N</b> |    |
| 1. UclD_EEZ6997767 | <b>I</b> Y <b>D</b> I <b>G</b> V <b>S</b> G <b>L</b> G          | <b>I</b> I <b>I</b> G <b>M</b> A <b>G</b> Y <b>W</b> P | A <b>T</b> I <b>P</b> L <b>V</b> P <b>I</b> N <b>S</b> S        | G <b>I</b> Y <b>I</b> D <b>P</b> V <b>G</b> A <b>N</b> |    |
| 2. UcaD_CAR41289.1 | <b>I</b> F <b>D</b> T <b>G</b> V <b>P</b> G <b>L</b> G          | <b>I</b> I <b>I</b> G <b>M</b> A <b>G</b> Y <b>W</b> P | A <b>T</b> I <b>P</b> L <b>V</b> P <b>I</b> N <b>S</b> S        | S <b>I</b> Y <b>I</b> D <b>P</b> V <b>A</b> A <b>N</b> |    |
| 3. GafD_Q47341     | <b>V</b> ----- <b>G</b> L <b>L</b>                              | <b>I</b> W <b>M</b> G <b>D</b> T <b>N</b> Y <b>S</b> R | <b>G</b> T <b>A</b> M-----                                      | ----- <b>S</b> G <b>N</b>                              |    |
|                    | 170                                                             | 180                                                    | 190                                                             | 200                                                    |    |
| Consensus          | <b>I</b> N <b>P</b> N <b>X</b> Y <b>N</b> G- <b>A</b>           | <b>T</b> G <b>S</b> F--- <b>G</b> A                    | <b>R</b> L <b>X</b> V <b>A</b> F <b>V</b> A <b>T</b> G          | <b>R</b> L <b>P</b> N <b>G</b> Y <b>X</b> T <b>I</b> P |    |
| 1. UclD_EEZ6997767 | <b>I</b> N <b>P</b> N <b>T</b> Y <b>N</b> G- <b>A</b>           | <b>T</b> A <b>S</b> F--- <b>G</b> A                    | <b>R</b> L <b>F</b> V <b>A</b> F <b>V</b> A <b>T</b> G          | <b>R</b> L <b>P</b> N <b>G</b> Y <b>I</b> T <b>I</b> P |    |
| 2. UcaD_CAR41289.1 | <b>I</b> N <b>P</b> N <b>A</b> Y <b>N</b> G- <b>A</b>           | <b>T</b> G <b>S</b> F--- <b>G</b> A                    | <b>R</b> L <b>Y</b> V <b>A</b> F <b>V</b> A <b>T</b> G          | <b>R</b> L <b>P</b> N <b>G</b> Y <b>V</b> T <b>I</b> P |    |
| 3. GafD_Q47341     | <b>S</b> W <b>E</b> N <b>V</b> F <b>S</b> G <b>W</b> C          | <b>V</b> G <b>N</b> Y <b>V</b> S <b>T</b> Q <b>G</b> L | <b>S</b> M <b>H</b> V <b>R</b> P <b>V</b> I <b>L</b> K          | <b>R</b> N <b>S</b> S <b>A</b> Q <b>Y</b> S <b>V</b> Q |    |
|                    | 210                                                             | 220                                                    | 230                                                             | 240                                                    |    |
| Consensus          | <b>T</b> X <b>Q</b> L <b>G</b> X <b>I</b> L <b>L</b> L <b>E</b> | X- <b>N</b> R <b>X</b> S <b>L</b> N <b>N</b> K         | X <b>L</b> T <b>A</b> P <b>V</b> M <b>L</b> N <b>G</b>          | <b>G</b> R <b>I</b> Q <b>V</b> Q <b>S</b> Q <b>T</b> C |    |
| 1. UclD_EEZ6997767 | <b>T</b> R <b>Q</b> L <b>G</b> T <b>I</b> L <b>L</b> L <b>E</b> | <b>A</b> - <b>K</b> R <b>T</b> S <b>L</b> N <b>N</b> K | <b>G</b> L <b>T</b> A <b>P</b> V <b>M</b> L <b>N</b> G          | <b>G</b> R <b>I</b> Q <b>V</b> Q <b>S</b> Q <b>T</b> C |    |
| 2. UcaD_CAR41289.1 | <b>T</b> K <b>Q</b> L <b>G</b> H <b>I</b> L <b>L</b> L <b>E</b> | <b>S</b> - <b>N</b> R <b>A</b> S <b>L</b> N <b>N</b> K | <b>R</b> L <b>T</b> A <b>P</b> V <b>M</b> L <b>N</b> G          | <b>G</b> R <b>I</b> Q <b>V</b> Q <b>S</b> Q <b>T</b> C |    |
| 3. GafD_Q47341     | <b>K</b> T <b>S</b> I <b>G</b> S <b>I</b> R <b>M</b> R          | <b>P</b> Y <b>N</b> G <b>S</b> S <b>A</b> G <b>S</b> V | <b>Q</b> T <b>I</b> V <b>N</b> F <b>S</b> L <b>N</b> P          | <b>F</b> T <b>L</b> N <b>D</b> T <b>V</b> T <b>S</b> C |    |
|                    | 250                                                             | 260                                                    | 270                                                             | 280                                                    |    |
| Consensus          | X <b>M</b> X <b>Q</b> K <b>N</b> Y <b>V</b> - <b>V</b>          | <b>P</b> L <b>N</b> T <b>V</b> Y <b>Q</b> S <b>Q</b> F | <b>T</b> S <b>L</b> Y <b>K</b> E <b>V</b> Q <b>G</b> G          | X <b>X</b> X <b>I</b> X <b>L</b> Q <b>C</b> X <b>D</b> |    |
| 1. UclD_EEZ6997767 | <b>T</b> M <b>G</b> Q <b>K</b> N <b>Y</b> V- <b>V</b>           | <b>P</b> L <b>N</b> T <b>V</b> Y <b>Q</b> S <b>Q</b> F | <b>T</b> S <b>L</b> Y <b>K</b> E <b>I</b> Q <b>G</b> G          | <b>K</b> I <b>D</b> I <b>H</b> L <b>Q</b> C <b>P</b> D |    |
| 2. UcaD_CAR41289.1 | <b>S</b> M <b>N</b> Q <b>K</b> N <b>Y</b> V- <b>V</b>           | <b>P</b> L <b>N</b> T <b>V</b> Y <b>Q</b> S <b>Q</b> F | <b>T</b> S <b>L</b> Y <b>K</b> E <b>V</b> Q <b>G</b> G          | <b>E</b> V <b>N</b> I <b>Q</b> L <b>Q</b> C <b>Q</b> D |    |
| 3. GafD_Q47341     | <b>R</b> I <b>L</b> T <b>P</b> S <b>A</b> V <b>N</b> V          | <b>S</b> L <b>A</b> A <b>I</b> S <b>A</b> G <b>Q</b> L | <b>P</b> S <b>S</b> G <b>D</b> E <b>V</b> V <b>A</b> G          | <b>T</b> T <b>S</b> L <b>K</b> L <b>Q</b> C <b>D</b> A |    |
|                    | 290                                                             | 300                                                    | 310                                                             | 320                                                    |    |
| Consensus          | <b>G</b> I <b>D</b> V <b>Y</b> A <b>T</b> L <b>L</b> T <b>D</b> | <b>A</b> T <b>Q</b> P <b>X</b> N <b>R</b> S <b>D</b> I | <b>L</b> T <b>L</b> X <b>X</b> X <b>S</b> T <b>A</b> K          | <b>G</b> V <b>G</b> L <b>R</b> L <b>Y</b> K <b>N</b> X |    |
| 1. UclD_EEZ6997767 | <b>G</b> I <b>D</b> V <b>Y</b> A <b>T</b> L <b>L</b> T <b>D</b> | <b>A</b> S <b>Q</b> P <b>V</b> N <b>R</b> T <b>D</b> I | <b>L</b> T <b>L</b> S <b>S</b> E <b>S</b> T <b>A</b> K          | <b>G</b> F <b>G</b> I <b>R</b> L <b>Y</b> K <b>D</b> S |    |
| 2. UcaD_CAR41289.1 | <b>G</b> I <b>D</b> V <b>Y</b> A <b>T</b> L <b>N</b> D          | <b>A</b> T <b>Q</b> H <b>G</b> N <b>R</b> S <b>D</b> I | <b>L</b> T <b>L</b> A <b>T</b> D <b>S</b> T <b>A</b> K          | <b>G</b> V <b>G</b> L <b>R</b> L <b>Y</b> K <b>N</b> N |    |
| 3. GafD_Q47341     | <b>G</b> V <b>I</b> W <b>A</b> T <b>L</b> L <b>T</b> D          | <b>A</b> T <b>T</b> P <b>S</b> N <b>R</b> S <b>D</b> I | <b>L</b> T <b>L</b> T <b>G</b> A <b>S</b> T <b>A</b> T          | <b>G</b> V <b>G</b> L <b>R</b> I <b>Y</b> K <b>N</b> T |    |
|                    | 330                                                             | 340                                                    | 350                                                             | 360                                                    |    |
| Consensus          | <b>D</b> V <b>T</b> A <b>I</b> S <b>Y</b> G <b>X</b> D          | <b>S</b> P <b>V</b> K <b>G</b> N <b>X</b> N <b>Q</b> W | <b>H</b> F <b>S</b> X <b>Y</b> R <b>G</b> E <b>X</b> N          | <b>P</b> X <b>I</b> X <b>L</b> X <b>A</b> N <b>Y</b> I |    |
| 1. UclD_EEZ6997767 | <b>D</b> V <b>T</b> A <b>I</b> S <b>Y</b> G <b>E</b> D          | <b>S</b> P <b>V</b> K <b>G</b> N <b>G</b> S <b>Q</b> W | <b>H</b> F <b>S</b> D <b>Y</b> R <b>G</b> E <b>V</b> N          | <b>P</b> H <b>I</b> N <b>L</b> R <b>A</b> N <b>Y</b> I |    |
| 2. UcaD_CAR41289.1 | <b>E</b> V <b>T</b> A <b>I</b> S <b>Y</b> G <b>S</b> D          | <b>T</b> P <b>N</b> K <b>G</b> N <b>Q</b> N <b>Q</b> W | <b>H</b> F <b>S</b> N <b>Y</b> R <b>G</b> E <b>I</b> N          | <b>P</b> R <b>I</b> K <b>I</b> K <b>A</b> N <b>Y</b> I |    |
| 3. GafD_Q47341     | <b>D</b> S <b>T</b> P <b>L</b> K <b>F</b> G <b>P</b> D          | <b>S</b> P <b>V</b> K <b>G</b> N <b>E</b> N <b>Q</b> W | <b>Q</b> L <b>S</b> T <b>G</b> T- <b>E</b> T <b>S</b>           | <b>P</b> S <b>V</b> R <b>L</b> Y <b>V</b> K <b>Y</b> V |    |
|                    | 370                                                             | 380                                                    | 382                                                             |                                                        |    |
| Consensus          | <b>K</b> T <b>X</b> X <b>X</b> I <b>T</b> P <b>G</b> S          | <b>V</b> K <b>A</b> I <b>A</b> T <b>I</b> T <b>F</b> S | <b>Y</b> Q                                                      |                                                        |    |
| 1. UclD_EEZ6997767 | <b>K</b> I <b>A</b> D <b>A</b> T <b>T</b> P <b>G</b> S          | <b>V</b> K <b>A</b> I <b>A</b> T <b>I</b> T <b>F</b> S | <b>Y</b> Q                                                      |                                                        |    |
| 2. UcaD_CAR41289.1 | <b>K</b> T <b>E</b> N <b>T</b> I <b>T</b> P <b>G</b> S          | <b>V</b> K <b>A</b> V <b>A</b> T <b>I</b> T <b>F</b> S | <b>Y</b> Q                                                      |                                                        |    |
| 3. GafD_Q47341     | <b>N</b> T <b>G</b> E <b>G</b> I <b>N</b> P <b>G</b> T          | <b>V</b> N <b>G</b> I <b>S</b> T <b>F</b> T <b>F</b> S | <b>Y</b> Q                                                      |                                                        |    |

337

338 **Fig N.** Amino acid sequence alignment of the UclD (NCBI protein entry EEZ6997767), UcaD  
339 (CAR41289.1) and GafD (Q47341) adhesins. Identical amino acids are shaded in black; similar  
340 amino acids are shaded in grey. The consensus sequence is indicated.

341

342

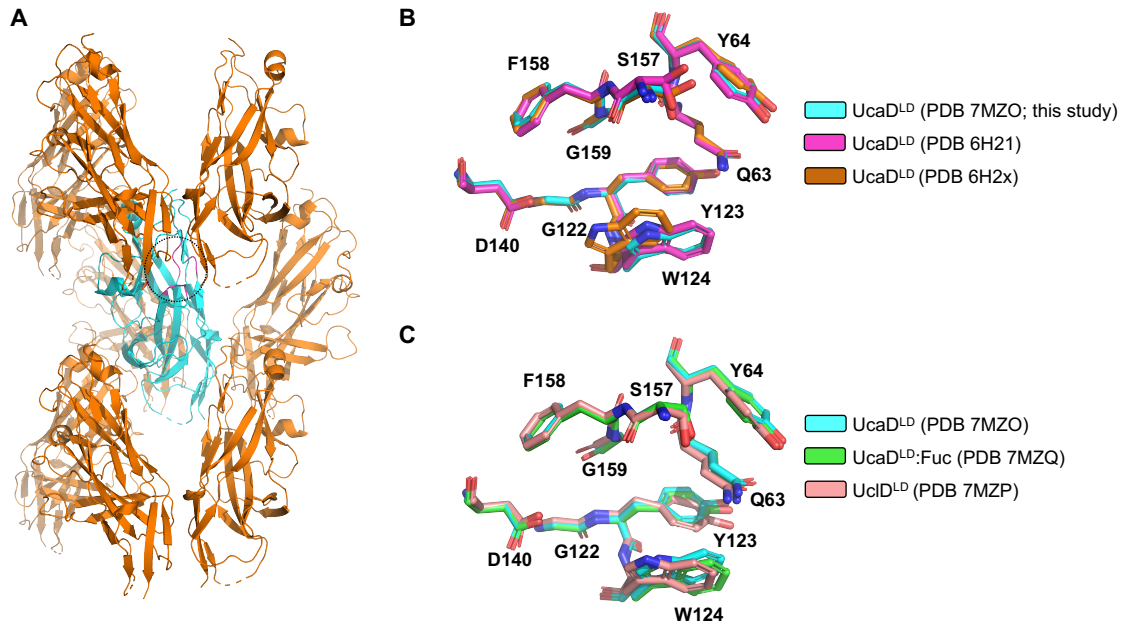

343

344 **Fig O. A)** Crystal packing analysis of UcaD<sup>LD</sup> (PDB: 7MZO). The molecules are shown in cartoon  
345 representation. The asymmetric unit consists of one UcaD<sup>LD</sup> molecule shown in cyan, while  
346 symmetry-related molecules are colored orange. The monosaccharide binding region of the  
347 asymmetric unit is circled and highlighted in magenta. **B)** Comparison of the monosaccharide  
348 binding site region in 3 different crystal forms of ligand-free UcaD<sup>LD</sup>. **C)** Comparison of the  
349 monosaccharide binding site in the UcaD<sup>LD</sup>:Fuc, UcaD<sup>LD</sup> and UclD<sup>LD</sup> crystal structures.

350

351

352

353

354

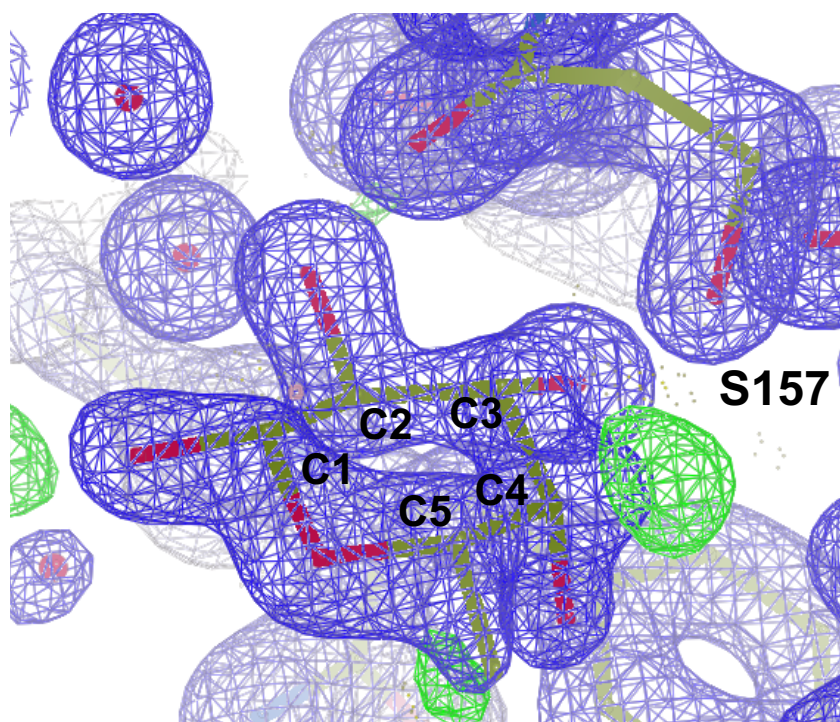

355

356

357 **Fig P. Electron density map of the fucose binding site in the  $UcaD^{LD}$ :Fuc complex structure.**

358 Composite ( $2F_o - F_c$ , blue, contoured at  $2\sigma$ ) and difference ( $F_o - F_c$ , green/red, contoured at  $3.0\sigma$ )

359 electron density map of the Fuc binding site after refinement. Positive difference density adjacent to

360 C4 suggests that a minor fraction of the Fuc molecules in the crystal adopts an alternate conformation.

361

362

363

364

365

366

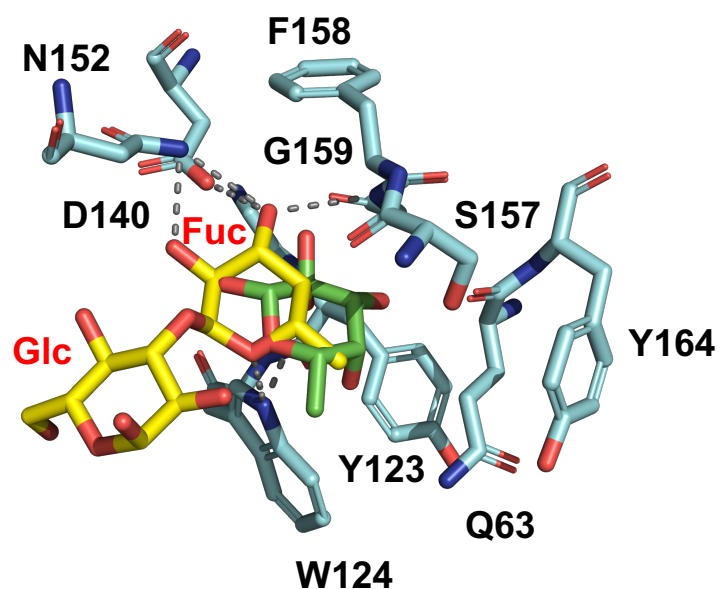

367

368

369 **Fig Q. UcaD<sup>LD</sup>:Fuc interactions in the MD derived structure.** Interactions between the fucose  
370 residue of lacto-N-fucopentose VI (yellow) and residues of the binding pocket of  $\leq 3.6$  Å are shown  
371 as dashed lines. The binding model of the fucose molecule observed in the UcaD<sup>LD</sup>:Fuc crystal  
372 structure is highlighted in green stick representation, for comparison.

373

374

375 **Supplementary Tables**376 **Table A. Crystallographic data.**

|                                                                                                                                                                                                                                                                     | UciD <sup>LD</sup><br>Dataset 1                | UciD <sup>LD</sup><br>Dataset 2                | UcaD <sup>LD</sup>                     | UcaD <sup>LD</sup><br>Galactose        | UcaD <sup>LD</sup><br>Fucose           | UcaD <sup>LD</sup><br>Glucose          |
|---------------------------------------------------------------------------------------------------------------------------------------------------------------------------------------------------------------------------------------------------------------------|------------------------------------------------|------------------------------------------------|----------------------------------------|----------------------------------------|----------------------------------------|----------------------------------------|
| <b>Data collection</b>                                                                                                                                                                                                                                              |                                                |                                                |                                        |                                        |                                        |                                        |
| Detector                                                                                                                                                                                                                                                            | ADSC<br>Quantum 210r<br>CCD                    | ADSC<br>Quantum 210r<br>CCD                    | ADSC<br>Quantum 315r<br>CCD            | ADSC<br>Quantum 315r<br>CCD            | Dectris<br>Eiger<br>X 16M              | Dectris<br>Eiger<br>X 16M              |
| Wavelength (Å)                                                                                                                                                                                                                                                      | 0.9537                                         | 1.3776                                         | 0.9537                                 | 0.9537                                 | 0.9537                                 | 0.9537                                 |
| Temperature (K)                                                                                                                                                                                                                                                     | 100                                            | 100                                            | 100                                    | 100                                    | 100                                    | 100                                    |
| Rotation range per image (°)                                                                                                                                                                                                                                        | 0.5                                            | 0.5                                            | 0.5                                    | 0.5                                    | 0.1                                    | 0.1                                    |
| Exposure time per image (s)                                                                                                                                                                                                                                         | 0.5                                            | 0.5                                            | 1                                      | 1                                      | 0.01                                   | 0.01                                   |
| Space group                                                                                                                                                                                                                                                         | P 2 <sub>1</sub> 2 <sub>1</sub> 2 <sub>1</sub> | P 2 <sub>1</sub> 2 <sub>1</sub> 2 <sub>1</sub> | I 4                                    | I 4                                    | I 4                                    | I 4                                    |
| <i>a</i> , <i>b</i> , <i>c</i> (Å)                                                                                                                                                                                                                                  | 39.04, 58.12,<br>175.42                        | 39.03, 58.26,<br>175.86                        | 77.39, 77.39,<br>70.91                 | 79.36, 79.36,<br>70.36                 | 79.47, 79.47,<br>70.23                 | 79.07, 79.07,<br>70.18                 |
| <i>α</i> , <i>β</i> , <i>γ</i> (°)                                                                                                                                                                                                                                  | 90.00, 90.00,<br>90.00                         | 90.00, 90.00,<br>90.00                         | 90.00, 90.00,<br>90.00                 | 90.00, 90.00,<br>90.00                 | 90.00, 90.00,<br>90.00                 | 90.00, 90.00,<br>90.00                 |
| Average mosaicity (°) <sup>b</sup>                                                                                                                                                                                                                                  | 0.76                                           | 0.71                                           | 0.88                                   | 0.84                                   | 0.12                                   | 0.09                                   |
| Resolution range (Å)                                                                                                                                                                                                                                                | 58.12-2.20<br>(2.27-2.20) <sup>a</sup>         | 87.93-2.85<br>(3.01-2.85) <sup>a</sup>         | 54.72-1.62<br>(1.65-1.62) <sup>a</sup> | 56.12-1.72<br>(1.75-1.72) <sup>a</sup> | 39.74-1.50<br>(1.53-1.50) <sup>a</sup> | 39.54-1.78<br>(1.81-1.78) <sup>a</sup> |
| Total no. of reflections                                                                                                                                                                                                                                            | 147408<br>(12817)                              | 259840<br>(33746)                              | 185132<br>(9197)                       | 83446 (4474)                           | 475741<br>(21842)                      | 283806<br>(13975)                      |
| No. of unique reflections                                                                                                                                                                                                                                           | 21160 (1794)                                   | 9966<br>(1412)                                 | 26588<br>(1305)                        | 23071 (1237)                           | 34590 (1653)                           | 20791 (1137)                           |
| Completeness (%)                                                                                                                                                                                                                                                    | 100.0 (100.0)                                  | 99.7<br>(99.6)                                 | 99.8<br>(99.9)                         | 99.4<br>(99.7)                         | 99.8<br>(95.7)                         | 99.8<br>(97.0)                         |
| Multiplicity                                                                                                                                                                                                                                                        | 7.0 (7.1)                                      | 26.1 (23.9)                                    | 7.0 (7.0)                              | 3.6 (3.6)                              | 13.8 (13.2)                            | 13.7 (12.3)                            |
| Mean <i>I</i> / <i>σ</i> ( <i>I</i> )                                                                                                                                                                                                                               | 5.4 (1.5)                                      | 14.1 (6.1)                                     | 11.6 (1.4)                             | 8.4 (1.5)                              | 18.3 (2.5)                             | 15.6 (3.3)                             |
| <i>R</i> <sub>meas</sub> (%) <sup>c</sup>                                                                                                                                                                                                                           | 27.9 (143.7)                                   | 19.0 (50.9)                                    | 11.9 (155.9)                           | 15.1 (131.9)                           | 6.6 (69.4)                             | 11.5 (58.4)                            |
| <i>R</i> <sub>pim</sub> (%) <sup>d</sup>                                                                                                                                                                                                                            | 10.5 (53.2)                                    | 3.7 (10.2)                                     | 4.5 (58.4)                             | 7.7 (68.7)                             | 1.8 (18.7)                             | 3.1 (16.2)                             |
| <i>CC</i> <sub>1/2</sub> <sup>b</sup>                                                                                                                                                                                                                               | 0.990 (0.748)                                  | 0.997 (0.985)                                  | 0.998 (0.634)                          | 0.990 (0.291)                          | 0.999<br>(0.895)                       | 0.999 (0.887)                          |
| <b>Refinement</b>                                                                                                                                                                                                                                                   |                                                |                                                |                                        |                                        |                                        |                                        |
| Resolution range (Å)                                                                                                                                                                                                                                                | 43.85-2.20                                     |                                                | 38.70-1.62                             | 39.68-1.72                             | 39.74-1.50                             | 39.54-1.78                             |
| <i>R</i> <sub>work</sub> (%) <sup>e</sup>                                                                                                                                                                                                                           | 24.8                                           |                                                | 16.9                                   | 17.3                                   | 16.3                                   | 16.2                                   |
| <i>R</i> <sub>free</sub> (%) <sup>f</sup>                                                                                                                                                                                                                           | 30.6                                           |                                                | 19.2                                   | 20.3                                   | 17.6                                   | 19.7                                   |
| No. of non-H atoms                                                                                                                                                                                                                                                  |                                                |                                                |                                        |                                        |                                        |                                        |
| Total                                                                                                                                                                                                                                                               | 2920                                           |                                                | 1709                                   | 1689                                   | 1678                                   | 1683                                   |
| Non-solvent                                                                                                                                                                                                                                                         | 2785                                           |                                                | 1457                                   | 148                                    | 1483                                   | 1479                                   |
| Water                                                                                                                                                                                                                                                               | 129                                            |                                                | 247                                    | 236                                    | 195                                    | 204                                    |
| Average isotropic <i>B</i> value (Å <sup>2</sup> )                                                                                                                                                                                                                  | 29.1                                           |                                                | 20.8                                   | 16.6                                   | 22.0                                   | 20.0                                   |
| R.m.s.d. from ideal geometry                                                                                                                                                                                                                                        |                                                |                                                |                                        |                                        |                                        |                                        |
| Bond lengths (Å)                                                                                                                                                                                                                                                    | 0.002                                          |                                                | 0.009                                  | 0.009                                  | 0.008                                  | 0.008                                  |
| Bond angles (°)                                                                                                                                                                                                                                                     | 0.553                                          |                                                | 0.957                                  | 0.970                                  | 0.936                                  | 0.936                                  |
| Ramachadran plot, residues in (%)                                                                                                                                                                                                                                   |                                                |                                                |                                        |                                        |                                        |                                        |
| Favoured regions                                                                                                                                                                                                                                                    | 96.19                                          |                                                | 97.35                                  | 97.31                                  | 97.35                                  | 97.34                                  |
| Additionally allowed regions                                                                                                                                                                                                                                        | 3.81                                           |                                                | 2.65                                   | 2.69                                   | 2.65                                   | 2.66                                   |
| Outlier regions                                                                                                                                                                                                                                                     | 0                                              |                                                | 0                                      | 0                                      | 0                                      | 0                                      |
| <sup>a</sup> The values in parentheses are for the highest-resolution shell.                                                                                                                                                                                        |                                                |                                                |                                        |                                        |                                        |                                        |
| <sup>b</sup> Calculated with AIMLESS [42].                                                                                                                                                                                                                          |                                                |                                                |                                        |                                        |                                        |                                        |
| <sup>c</sup> $R_{meas} = \frac{\sum hkl \{N(hkl)/[N(hkl)-1]\}^{1/2} \sum_i  I_i(hkl) - \langle I(hkl) \rangle }{\sum hkl \sum_i I_i(hkl)}$ , where $I_i(hkl)$ is the intensity of the <i>i</i> th measurement of an equivalent reflection with indices <i>hkl</i> . |                                                |                                                |                                        |                                        |                                        |                                        |
| <sup>d</sup> $R_{pim} = \frac{\sum hkl \{1/[N(hkl)-1]\}^{1/2} \sum_i  I_i(hkl) - \langle I(hkl) \rangle }{\sum hkl \sum_i I_i(hkl)}$ .                                                                                                                              |                                                |                                                |                                        |                                        |                                        |                                        |
| <sup>e</sup> $R_{work} = \frac{\sum hkl   F_{obs}  -  F_{calc}  }{\sum hkl  F_{obs} }$ , where $F_{obs}$ and $F_{calc}$ are the observed and calculated structure factor amplitudes.                                                                                |                                                |                                                |                                        |                                        |                                        |                                        |
| <sup>f</sup> $R_{free}$ is equivalent to $R_{work}$ but calculated with reflections (5-10%) omitted from the refinement process.                                                                                                                                    |                                                |                                                |                                        |                                        |                                        |                                        |



377

378 **Table B. Polar interactions in the UcaD<sup>LD</sup>: monosaccharide complexes<sup>1</sup>.**

379

| PROTEIN ATOM      | FUCOSE      |              | GLUCOSE     |              | GALACTOSE   |              |
|-------------------|-------------|--------------|-------------|--------------|-------------|--------------|
|                   | Ligand atom | Distance (A) | Ligand atom | Distance (A) | Ligand atom | Distance (A) |
| N63 NE2           | O4          | 3            | O2          | 2.9          | O5          | 3.3          |
| N63 NE2           | -           | -            | -           | -            | O6          | 2.9          |
| N63 O             | O3          | 2.7          | O3          | 2.8          | O1          | 2.7          |
| W124 NE1          | O5          | 3.2          | O5          | 3.1          | O4          | 2.8          |
| W124 NE1          | O4          | 3.1          | -           | -            | -           | -            |
| S157 OG           | -           | -            | O2          | 2.8          | O1          | 2.8          |
| G159 N            | O3          | 3            | O3          | 3.1          | O1          | 3.4          |
| G159 N            | O2          | 2.9          | O4          | 2.9          | O2          | 2.8          |
| HOH1 <sup>2</sup> | O2          | 2.6          | O4          | 2.6          | O2          | 2.6          |

380

381 <sup>1</sup>Bond distances are based on the distances between nitrogen and oxygen atoms and do not include  
382 hydrogen atoms. <sup>2</sup>The water molecule is displayed in Figure 5.

383

384

385

386 **Table C: List of strains and plasmids used in this study.**

| Strains or plasmids                         | Relevant description                                                                          | Reference(s) or source |
|---------------------------------------------|-----------------------------------------------------------------------------------------------|------------------------|
| <b>Strains</b>                              |                                                                                               |                        |
| MS528                                       | <i>E. coli</i> K-12 MG1655 $\Delta$ <i>fim</i> $\Delta$ <i>flu</i>                            | [30]                   |
| BL21(DE3) pLys                              |                                                                                               |                        |
| F11                                         | UPEC cystitis isolate                                                                         | [30-32]                |
| F11 <i>ucl</i>                              | F11 <i>uclA-D::cm</i> ; Cm <sup>r</sup>                                                       | This study             |
| F11 <i>lacI-Z</i>                           | F11 <i>lacI-Z::gfp</i>                                                                        | This study             |
| F11 <i>lacI-Z-PucI::lacZ</i>                | F11 <i>lacI-Z::gfp PucI::lacZ</i>                                                             | This study             |
| F11-PucI <sup>T78G</sup>                    | F11-PucI <sup>T78G</sup>                                                                      | This study             |
| F11 <i>lacI-Z-PucI<sup>T78G</sup>::lacZ</i> | F11 <i>lacI-Z::gfp PucI<sup>T78G</sup>::lacZ</i>                                              | This study             |
| F11 <i>oxyR</i>                             | F11 <i>oxyR</i>                                                                               | This study             |
| F11-PucI <sup>T78G</sup> <i>oxyR</i>        | F11-PucI <sup>T78G</sup> <i>oxyR</i>                                                          | This study             |
| UTI89                                       | UPEC cystitis isolate                                                                         | [33, 34]               |
| UTI89 <i>ucl</i>                            | UTI89 <i>uclA-D::cm</i> ; Cm <sup>r</sup>                                                     | This study             |
| UTI89 <i>lacI-Z</i>                         | UTI89 <i>lacI-Z::gfp</i>                                                                      | This study             |
| UTI89-PucI <sup>G78T</sup>                  | UTI89-PucI <sup>G78T</sup>                                                                    | This study             |
| S77EC                                       | Clinical ST131 isolate                                                                        | [35]                   |
| S77EC $\Delta$ <i>ucl</i>                   | S77EC <i>uclA-D::cm</i> ; Cm <sup>r</sup>                                                     | This study             |
| HVM1299                                     | Clinical ST131 isolate                                                                        | [35]                   |
| HVM1299 <i>ucl</i>                          | HVM1299 <i>uclA-D::cm</i> ; Cm <sup>r</sup>                                                   | This study             |
| TOP10 pSU2718:: <i>uclABCD</i>              | <i>E. coli</i> TOP10 + pSU2718:: <i>uclABCD</i> (pUcl)                                        | This study             |
| MS528 pSU2718:: <i>uclABCD</i>              | <i>E. coli</i> K-12 MG1655 <i>fim,flu</i> pSU2718:: <i>uclABCD</i> (pUcl)                     | This study             |
| <i>P. mirabilis</i> PM54                    | UTI clinical isolate                                                                          | [36]                   |
| <b>Plasmids</b>                             |                                                                                               |                        |
| pKOBEG                                      | $\lambda$ -Red recombinase expression vector                                                  | [37]                   |
| pCP20                                       | FLP flipase expression vector                                                                 | [37]                   |
| pSU2718                                     | pACYC184-derived cloning plasmid                                                              | [38]                   |
| pQF50                                       | Promoterless <i>lacZ</i> reporter plasmid                                                     | [39]                   |
| pQF50-PucI <sub>F11</sub>                   | <i>ucl</i> promoter region from F11 cloned in pQF50                                           | This study             |
| pQF50-PucI <sub>UTI89</sub>                 | <i>ucl</i> promoter region from UTI89 cloned in pQF50                                         | This study             |
| pSU2718:: <i>uclABCD</i> (pUcl)             | <i>uclABCD</i> operon from F11 cloned into pSU2718                                            | This study             |
| pBAD/myc-HisA                               | Arabinose-inducible promoter, Amp <sup>R</sup>                                                | [40]                   |
| pOxyR                                       | <i>oxyR</i> gene from <i>E. coli</i> MG1655 in pBAD/myc-HisA (pMGJ1)                          | [41]                   |
| pOxyR-6xHis                                 | pOxyR modified to encode OxyR containing C-terminal 6xHistag                                  | This study             |
| pET22b                                      | Expression vector, T7 promoter, N-ter pelB signal sequence, C-ter 6xHis tag, Amp <sup>R</sup> | Novagen                |
| pET22b:: <i>uclD</i>                        | Lectin binding domain of <i>uclD</i> from F11 cloned into pET22b                              | This study             |
| pET22b:: <i>ucaD</i>                        | Lectin binding domain of <i>ucaD</i> from PM54 cloned into pET22b                             | This study             |

387

388

390 **Table D: List of primers used in this study.**

| Primer name                        | Sequence (5' to 3')                                                                        |
|------------------------------------|--------------------------------------------------------------------------------------------|
| <b>Mutant generation</b>           |                                                                                            |
| 6310- <i>ucl</i> :cm.1             | tagcaagcgtagcgtaacag                                                                       |
| 6311- <i>ucl</i> :cm.2             | cacagcagaacaatgtagcc                                                                       |
| 6312- <i>ucl</i> :cm.3             | gcattggctacattgtttctgctgtgctccttagtcctattcc                                                |
| 6313- <i>ucl</i> :cm.4             | cactccagggtagttgcatcagcaagtcttgagcgattgtgtagg                                              |
| 6314- <i>ucl</i> :cm.5             | ttgctgatgcaactacacctg                                                                      |
| 6315- <i>ucl</i> :cm.6             | tagtggctgctccgtagcc                                                                        |
| 5080- <i>oxyR</i> .1               | caatctcctcgccagccca                                                                        |
| 5078- <i>oxyR</i> .2               | gcagggtgatgggtcagaa                                                                        |
| 3842- <i>oxyR</i> .3               | ggaataggaactaaggaggatgccaccaggtactcaagatc                                                  |
| 3843- <i>oxyR</i> .4               | cctacacaatcgctcaagacaagtgtaaaacaggcgggt                                                    |
| 5079- <i>oxyR</i> .5               | aggtaaacagcatgtatcag                                                                       |
| 5081- <i>oxyR</i> .6               | actgtctgctctatgccaa                                                                        |
| 4057- <i>lacIZ::cm-gfp</i> 700bp F | tcgtcttcatectgctcttc                                                                       |
| 4058- <i>lacIZ::cm-gfp</i> 700bp R | gctaaatgccgaatggttg                                                                        |
| 7900_uclAprom_TtoG                 | a*t*ggttttgatcgttttcccagctgttttagcaatcatgataGgtgcaatctatcacgctggttatcgatcggtaaaaacattt*t*g |
| 7901_uclAprom_GtoT                 | a*t*ggttttgatcgttttcccagctgttttagcaatcatgataTgtgcaatctatcacgctggttatcgatcggtaaaaacattt*t*g |
| <b>5' RACE</b>                     |                                                                                            |
| 6973- <i>PuclA</i> -5'RACE GSP1    | ctgagcactattcatacc                                                                         |
| 6974- <i>PuclA</i> -5'RACE GSP2    | gaatggcaagggtgtcag                                                                         |
| <b>Cloning</b>                     |                                                                                            |
| 6571-BamHI- <i>Pucl</i> -F         | cgcgggatcccgggcatggatgtttgttat                                                             |
| 6572-HindIII- <i>Pucl</i> -R       | cccggaagcttccagattgatcattgttcagc                                                           |
| 6568- <i>uclABCD</i> -F            | cgcgggatccgtttgttgggatgattgc                                                               |
| 6569- <i>uclABCD</i> -R            | cccggctagattattgatagagaaagtaatagttg                                                        |
| 11190_OxyR_cterGG6xHis_F           | ggcggatcatcaccatcaccactgagtttaaacg                                                         |
| 11191_OxyR_cterGG6xHis_R           | aaccgcctgttttaaacatttatcg                                                                  |
| <b>Gel shift assay</b>             |                                                                                            |
| 11206_PuclA-F2                     | aataggtcgctcatttcagg                                                                       |
| 11207_PuclA-F2-cy3                 | cy3-aataggtcgctcatttcagg                                                                   |
| 11208_PuclA-R2                     | cagcagaacaatgtagcc                                                                         |
| 11193_uclC-F                       | tcatgcctgattactgtcg                                                                        |
| 11196_uclC-R2                      | atactgcaaatcagccttcc                                                                       |

394 **Table E. Glycan array analysis of UclD and UcaD**

| <b>Glycan structure</b>                                               | <b>ID</b> | <b>UclD</b> | <b>UcaD</b> |
|-----------------------------------------------------------------------|-----------|-------------|-------------|
| <b>Monosaccharides</b>                                                |           |             |             |
| Fuc $\alpha$ -sp3                                                     | 1         | <1          | <1          |
| Gal $\alpha$ -sp3                                                     | 2         | <1          | <1          |
| Gal $\beta$ -sp3                                                      | 3         | <1          | <1          |
| GalNAc $\alpha$ -sp0                                                  | 4         | <1          | <1          |
| GalNAc $\alpha$ -sp3                                                  | 5         | <1          | <1          |
| GalNAc $\beta$ -sp3                                                   | 6         | <1          | <1          |
| Glc $\alpha$ -sp3                                                     | 7         | <1          | <1          |
| Glc $\beta$ -sp3                                                      | 9         | <1          | <1          |
| GlcNAc $\beta$ -sp3                                                   | 10        | <1          | <1          |
| GlcN(Gc) $\beta$ -sp4                                                 | 14        | <1          | <1          |
| HOCH <sub>2</sub> (HOCH) <sub>4</sub> CH <sub>2</sub> NH <sub>2</sub> | 15        | <1          | <1          |
| Man $\alpha$ -sp3                                                     | 16        | <1          | <1          |
| Man $\beta$ -sp4                                                      | 18        | <1          | <1          |
| ManNAc $\beta$ -sp4                                                   | 19        | <1          | <1          |
| Rha $\alpha$ -sp3                                                     | 20        | <1          | <1          |
| GlcNAc $\beta$ -sp4                                                   | 22        | <1          | <1          |
| 3-O-Su-Gal $\beta$ -sp3                                               | 37        | <1          | <1          |
| 3-O-Su-GalNAc $\alpha$ -sp3                                           | 38        | <1          | <1          |
| 6-O-Su-GlcNAc $\beta$ -sp3                                            | 43        | <1          | <1          |
| GlcA $\alpha$ -sp3                                                    | 44        | <1          | <1          |
| GlcA $\beta$ -sp3                                                     | 45        | <1          | <1          |
| 6-H <sub>2</sub> PO <sub>3</sub> Glc $\beta$ -sp4                     | 46        | <1          | <1          |
| 6-H <sub>2</sub> PO <sub>3</sub> Man $\alpha$ -sp3                    | 47        | <1          | <1          |
| Neu5Ac $\alpha$ -sp3                                                  | 48        | <1          | <1          |
| Neu5Ac $\alpha$ -sp9                                                  | 49        | <1          | <1          |
| Neu5Gc $\alpha$ -sp3                                                  | 52        | <1          | <1          |
| 9-Nac-Neu5Ac $\alpha$ -sp3                                            | 54        | <1          | <1          |
| 3-O-Su-GlcNAc $\beta$ -sp3                                            | 55        | <1          | <1          |
| <b>Terminal Galactose</b>                                             |           |             |             |
| Gal $\alpha$ 1-2Gal $\beta$ -sp3                                      | 75        | <1          | <1          |
| Gal $\alpha$ 1-3Gal $\beta$ -sp3                                      | 76        | <1          | <1          |
| Gal $\alpha$ 1-3GalNAc $\beta$ -sp3                                   | 77        | <1          | <1          |
| Gal $\alpha$ 1-3GalNAc $\alpha$ -sp3                                  | 78        | <1          | <1          |
| Gal $\alpha$ 1-3GlcNAc $\beta$ -sp3                                   | 80        | <1          | <1          |
| Gal $\alpha$ 1-4GlcNAc $\beta$ -sp3                                   | 81        | <1          | <1          |
| Gal $\alpha$ 1-6Glc $\beta$ -sp4                                      | 83        | <1          | <1          |
| Gal $\beta$ 1-2Gal $\beta$ -sp3                                       | 84        | <1          | <1          |
| Gal $\beta$ 1-3GlcNAc $\beta$ -sp3                                    | 85        | <1          | <1          |
| Gal $\beta$ 1-3Gal $\beta$ -sp3                                       | 87        | <1          | <1          |
| Gal $\beta$ 1-3GalNAc $\beta$ -sp3                                    | 88        | <1          | <1          |
| Gal $\beta$ 1-3GalNAc $\alpha$ -sp3                                   | 89        | <1          | <1          |
| Gal $\beta$ 1-4Glc $\beta$ -sp4                                       | 93        | <1          | <1          |
| Gal $\beta$ 1-4Gal $\beta$ -sp4                                       | 94        | <1          | <1          |
| Gal $\beta$ 1-4GlcNAc $\beta$ -sp3                                    | 97        | <1          | <1          |
| Gal $\beta$ 1-6Gal $\beta$ -sp4                                       | 100       | <1          | <1          |
| Gal $\beta$ 1-3(6-O-Su)GlcNAc $\beta$ -sp3                            | 145       | <1          | <1          |
| Gal $\beta$ 1-4(6-O-Su)Glc $\beta$ -sp2                               | 146       | <1          | <1          |

|                                                 |     |    |            |
|-------------------------------------------------|-----|----|------------|
| Galβ1-4(6-O-Su)GlcNAcβ-sp3                      | 147 | <1 | <1         |
| 3-O-Su-Galβ1-3GalNAcα-sp3                       | 150 | <1 | <1         |
| 6-O-Su-Galβ1-3GalNAcα-sp3                       | 151 | <1 | <1         |
| 3-O-Su-Galβ1-4Glcβ-sp2                          | 152 | <1 | <1         |
| 6-O-Su-Galβ1-4Glcβ-sp2                          | 153 | <1 | <1         |
| 3-O-Su-Galβ1-3GlcNAcβ-sp3                       | 155 | <1 | <1         |
| 3-O-Su-Galβ1-4GlcNAcβ-sp3                       | 157 | <1 | <1         |
| 4-O-Su-Galβ1-4GlcNAcβ-sp3                       | 159 | <1 | <1         |
| 6-O-Su-Galβ1-3GlcNAcβ-sp3                       | 161 | <1 | <1         |
| 6-O-Su-Galβ1-4GlcNAcβ-sp3                       | 163 | <1 | <1         |
| 3-O-Su-Galβ1-4(6-O-Su)Glcβ-sp2                  | 176 | <1 | <1         |
| 3-O-Su-Galβ1-4(6-O-Su)GlcNAcβ-sp2               | 177 | <1 | <1         |
| 6-O-Su-Galβ1-4(6-O-Su)Glcβ-sp2                  | 178 | <1 | <1         |
| 6-O-Su-Galβ1-3(6-O-Su)GlcNAcβ-sp2               | 179 | <1 | <1         |
| 6-O-Su-Galβ1-4(6-O-Su)GlcNAcβ-sp2               | 180 | <1 | <1         |
| 3,4-O-Su2-Galβ1-4GlcNAcβ-sp3                    | 181 | <1 | <1         |
| 3,6-O-Su2-Galβ1-4GlcNAcβ-sp2                    | 182 | <1 | <1         |
| 4,6-O-Su2-Galβ1-4GlcNAcβ-sp2                    | 183 | <1 | <1         |
| 4,6-O-Su2-Galβ1-4GlcNAcβ-sp3                    | 184 | <1 | <1         |
| 3,6-O-Su2-Galβ1-4(6-O-Su)GlcNAcβ-sp2            | 189 | <1 | <1         |
| 3,4-O-Su2-Galβ1-4GlcNAcβ-sp3                    | 201 | <1 | <1         |
| Galβ1-4(6-O-Su)GlcNAcβ-sp2                      | 203 | <1 | <1         |
| Galα1-3Galβ1-4Glcβ-sp2                          | 220 | <1 | <1         |
| Galα1-3Galβ1-4GlcNAcβ-sp3                       | 222 | <1 | <1         |
| Galα1-4Galβ1-4Glcβ-sp3                          | 224 | <1 | <1         |
| Galα1-4Galβ1-4GlcNAc-sp2                        | 225 | <1 | <1         |
| Galβ1-2Galα1-4GlcNAcβ-sp4                       | 228 | <1 | <1         |
| Galβ1-3Galβ1-4GlcNAcβ-sp4                       | 229 | <1 | <1         |
| Galβ1-4GlcNAcβ1-3GalNAcα-sp3                    | 231 | <1 | 5.882±1.12 |
| Galβ1-4GlcNAcβ1-6GalNAcα-sp3                    | 232 | <1 | <1         |
| Galβ1-3(GlcNAcβ1-6)GalNAcα-sp3                  | 254 | <1 | <1         |
| Galβ1-3GalNAcβ1-3Gal-sp4                        | 262 | <1 | 4.944±0.98 |
| Galβ1-4Galβ1-4GlcNAc-sp3                        | 264 | <1 | <1         |
| Galα1-3Galβ1-4GlcNAcβ1-3Galβ-sp3                | 373 | <1 | <1         |
| Galα1-4GlcNAcβ1-3Galβ1-4GlcNAcβ-sp3             | 375 | <1 | <1         |
| Galβ1-3GlcNAcβ1-3Galβ1-4Glcβ-sp4                | 376 | <1 | <1         |
| Galβ1-3GlcNAcβ1-3Galβ1-3GlcNAcβ-sp2             | 377 | <1 | <1         |
| Galβ1-3GlcNAcα1-3Galβ1-4GlcNAcβ-sp3             | 378 | <1 | <1         |
| Galβ1-3GlcNAcβ1-3Galβ1-4GlcNAcβ-sp3             | 379 | <1 | <1         |
| Galβ1-3GlcNAcα1-6Galβ1-4GlcNAcβ-sp2             | 380 | <1 | <1         |
| Galβ1-3GlcNAcβ1-6Galβ1-4GlcNAcβ-sp2             | 381 | <1 | <1         |
| Galβ1-3GalNAcβ1-4Galβ1-4Glcβ-sp3                | 382 | <1 | <1         |
| Galβ1-4GlcNAcβ1-3Galβ1-4Glcβ-sp2                | 383 | <1 | <1         |
| Galβ1-4GlcNAcβ1-3Galβ1-4GlcNAcβ-sp3             | 385 | <1 | <1         |
| Galβ1-4GlcNAcβ1-6Galβ1-4GlcNAcβ-sp2             | 387 | <1 | <1         |
| Galβ1-4GlcNAcβ1-6(Galβ1-3)GalNAcα-sp3           | 388 | <1 | <1         |
| Galβ1-4GlcNAcβ1-6(Galβ1-4GlcNAcβ1-3)GalNAcα-sp3 | 488 | <1 | 5.566±1.08 |
| Galβ1-4GlcNAcβ1-3(Galβ1-4GlcNAcβ1-6)GalNAcα-sp3 | 504 | <1 | <1         |
| Galβ1-3GlcNAc                                   | 1A  | <1 | <1         |
| Galβ1-4GlcNAc                                   | 1B  | <1 | <1         |
| Galβ1-4Gal                                      | 1C  | <1 | 2.886±0.77 |
| Galβ1-6GlcNAc                                   | 1D  | <1 | <1         |

|                                                                                                                         |     |    |    |
|-------------------------------------------------------------------------------------------------------------------------|-----|----|----|
| Gal $\beta$ 1-3GalNAc                                                                                                   | 1E  | <1 | <1 |
| Gal $\beta$ 1-3GalNAc $\beta$ 1-4Gal $\beta$ 1-4Glc                                                                     | 1F  | <1 | <1 |
| Gal $\beta$ 1-3GlcNAc $\beta$ 1-3Gal $\beta$ 1-4Glc                                                                     | 1G  | <1 | <1 |
| Gal $\beta$ 1-4GlcNAc $\beta$ 1-3Gal $\beta$ 1-4Glc                                                                     | 1H  | <1 | <1 |
| Gal $\beta$ 1-4GlcNAc $\beta$ 1-6(Gal $\beta$ 1-4GlcNAc $\beta$ 1-3)Gal $\beta$ 1-4Glc                                  | 1I  | <1 | <1 |
| Gal $\beta$ 1-4GlcNAc $\beta$ 1-6(Gal $\beta$ 1-3GlcNAc $\beta$ 1-3)Gal $\beta$ 1-4Glc                                  | 1J  | <1 | <1 |
| Gala1-4Gal $\beta$ 1-4Glc                                                                                               | 1K  | <1 | <1 |
| GalNAc $\alpha$ 1-O-Ser                                                                                                 | 1L  | <1 | <1 |
| Gal $\beta$ 1-3GalNAc $\alpha$ 1-O-Ser                                                                                  | 1M  | <1 | <1 |
| Gala1-3Gal                                                                                                              | 1N  | <1 | <1 |
| Gala1-3Gal $\beta$ 1-4GlcNAc                                                                                            | 1O  | <1 | <1 |
| Gala1-3Gal $\beta$ 1-4Glc                                                                                               | 1P  | <1 | <1 |
| Gala1-3Gal $\beta$ 1-4Gal $\alpha$ 1-3Gal                                                                               | 2A  | <1 | <1 |
| Gal $\beta$ 1-6Gal                                                                                                      | 2B  | <1 | <1 |
| GalNAc $\beta$ 1-3Gal                                                                                                   | 2C  | <1 | <1 |
| GalNAc $\beta$ 1-4Gal                                                                                                   | 2D  | <1 | <1 |
| Gal $\alpha$ 1-4Gal $\beta$ 1-4GlcNAc                                                                                   | 2E  | <1 | <1 |
| GalNAc $\alpha$ 1-3Gal $\beta$ 1-4Glc                                                                                   | 2F  | <1 | <1 |
| Gal $\beta$ 1-3GlcNAc $\beta$ 1-3Gal $\beta$ 1-4GlcNAc $\beta$ 1-6(Gal $\beta$ 1-3GlcNAc $\beta$ 1-3)Gal $\beta$ 1-4Glc | 2G  | <1 | <1 |
| Gal $\beta$ 1-3GlcNAc $\beta$ 1-3Gal $\beta$ 1-4GlcNAc $\beta$ 1-3Gal $\beta$ 1-4Glc                                    | 2H  | <1 | <1 |
| Gal $\beta$ 1-3GalNAc $\beta$ 1-3Gal $\alpha$ 1-4Gal $\beta$ 1-4Glc                                                     | 18B | <1 | <1 |
| Gal $\beta$ 1-3GalNAc $\beta$ 1-3Gal                                                                                    | 18C | <1 | <1 |
| Gal $\beta$ 1-4Glc                                                                                                      | 18L | <1 | <1 |
| Gal $\beta$ 1-4Gal                                                                                                      | 18M | <1 | <1 |
| Gal $\beta$ 1-6Gal                                                                                                      | 18N | <1 | <1 |
| <b>Terminal N-Acetylgalactosamine</b>                                                                                   |     |    |    |
| GalNAc $\alpha$ 1-3GalNAc $\beta$ -sp3                                                                                  | 101 | <1 | <1 |
| GalNAc $\alpha$ 1-3Gal $\beta$ -sp3                                                                                     | 102 | <1 | <1 |
| GalNAc $\alpha$ 1-3GalNAc $\alpha$ -sp3                                                                                 | 103 | <1 | <1 |
| GalNAc $\beta$ 1-3Gal $\beta$ -sp3                                                                                      | 104 | <1 | <1 |
| GalNAc $\beta$ 1-4GlcNAc $\beta$ -sp3                                                                                   | 106 | <1 | <1 |
| GalNAc $\beta$ 1-4(6-O-Su)GlcNAc $\beta$ -sp3                                                                           | 192 | <1 | <1 |
| 3-O-Su-GalNAc $\beta$ 1-4GlcNAc $\beta$ -sp3                                                                            | 193 | <1 | <1 |
| 6-O-Su-GalNAc $\beta$ 1-4GlcNAc $\beta$ -sp3                                                                            | 194 | <1 | <1 |
| 6-O-Su-GalNAc $\beta$ 1-4-(3-O-Su)GlcNAc $\beta$ -sp3                                                                   | 195 | <1 | <1 |
| 3-O-Su-GalNAc $\beta$ 1-4(3-O-Su)-GlcNAc $\beta$ -sp3                                                                   | 196 | <1 | <1 |
| 3,6-O-Su <sub>2</sub> -GalNAc $\beta$ 1-4GlcNAc $\beta$ -sp3                                                            | 197 | <1 | <1 |
| 4,6-O-Su <sub>2</sub> -GalNAc $\beta$ 1-4GlcNAc $\beta$ -sp3                                                            | 198 | <1 | <1 |
| 4,6-O-Su <sub>2</sub> -GalNAc $\beta$ 1-4-(3-O-Ac)GlcNAc $\beta$ -sp3                                                   | 199 | <1 | <1 |
| 4-O-Su-GalNAc $\beta$ 1-4GlcNAc $\beta$ -sp3                                                                            | 200 | <1 | <1 |
| 6-O-Su-GalNAc $\beta$ 1-4(6-O-Su)GlcNAc $\beta$ -sp3                                                                    | 202 | <1 | <1 |
| 4-O-Su-GalNAc $\beta$ 1-4GlcNAc $\beta$ -sp2                                                                            | 204 | <1 | <1 |
| GalNAc $\beta$ 1-4Gal $\beta$ 1-4Glc $\beta$ -sp3                                                                       | 238 | <1 | <1 |
| GalNAc $\beta$ 1-3Gal $\alpha$ 1-4Gal $\beta$ 1-4Glc $\beta$ -sp3                                                       | 389 | <1 | <1 |
| GalNAc $\alpha$ 1-O-Ser                                                                                                 | 1L  | <1 | <1 |
| GalNAc $\beta$ 1-3Gal                                                                                                   | 2C  | <1 | <1 |
| GalNAc $\beta$ 1-4Gal                                                                                                   | 2D  | <1 | <1 |
| GalNAc $\alpha$ 1-3Gal $\beta$ 1-4Glc                                                                                   | 2F  | <1 | <1 |
| <b>Terminal N-Acetylglucosamine</b>                                                                                     |     |    |    |
| GlcNAc $\beta$ 1-3GalNAc $\alpha$ -sp3                                                                                  | 113 | <1 | <1 |
| GlcNAc $\beta$ 1-3Man $\beta$ -sp4                                                                                      | 114 | <1 | <1 |

|                                                                                                  |     |    |    |
|--------------------------------------------------------------------------------------------------|-----|----|----|
| GlcNAc $\beta$ 1-4GlcNAc $\beta$ -Asn                                                            | 115 | <1 | <1 |
| GlcNAc $\beta$ 1-4GlcNAc $\beta$ -sp4                                                            | 117 | <1 | <1 |
| GlcNAc $\beta$ 1-6GalNAc $\alpha$ -sp3                                                           | 118 | <1 | <1 |
| GlcNAc $\beta$ 1-4(6-O-Su)GlcNAc $\beta$ -sp2                                                    | 149 | <1 | <1 |
| GlcNAc $\beta$ 1-4-[HOOC(CH <sub>3</sub> )CH]-3-O-GlcNAc $\beta$ -sp4                            | 167 | <1 | <1 |
| GlcNAc $\beta$ 1--[HOOC(CH <sub>3</sub> )CH]-3-O-GlcNAc $\beta$ -L-alanyl-D-i-glutaminy-L-lysine | 168 | <1 | <1 |
| GlcNAc $\beta$ 1-2Gal $\beta$ 1-3GalNAc $\alpha$ -sp3                                            | 246 | <1 | <1 |
| GlcNAc $\beta$ 1-3Gal $\beta$ 1-3GalNAc $\alpha$ -sp3                                            | 247 | <1 | <1 |
| GlcNAc $\beta$ 1-3Gal $\beta$ 1-4Glc $\beta$ -sp2                                                | 248 | <1 | <1 |
| GlcNAc $\beta$ 1-3Gal $\beta$ 1-4GlcNAc $\beta$ -sp3                                             | 250 | <1 | <1 |
| GlcNAc $\beta$ 1-4Gal $\beta$ 1-4GlcNAc $\beta$ -sp2                                             | 251 | <1 | <1 |
| GlcNAc $\beta$ 1-4GlcNAc $\beta$ 1-4GlcNAc $\beta$ -sp4                                          | 252 | <1 | <1 |
| GlcNAc $\beta$ 1-6Gal $\beta$ 1-4GlcNAc $\beta$ -sp2                                             | 253 | <1 | <1 |
| GlcNAc $\beta$ 1-3(GlcNAc $\beta$ 1-6)GalNAc $\alpha$ -sp3                                       | 255 | <1 | <1 |
| GlcNAc $\beta$ 1-3(GlcNAc $\beta$ 1-6)Gal $\beta$ 1-4GlcNAc $\beta$ -sp3                         | 395 | <1 | <1 |
| (GlcNAc $\beta$ 1-4) $\beta$ -sp4                                                                | 493 | <1 | <1 |
| (GlcNAc $\beta$ 1-4) $\beta$ -sp4                                                                | 503 | <1 | <1 |
| (GN-M) <sub>2</sub> -3,6-M-GN-GN $\beta$ -sp4                                                    | 505 | <1 | <1 |
| GlcNAc $\beta$ 1-4GlcNAc                                                                         | 4A  | <1 | <1 |
| GlcNAc $\beta$ 1-4GlcNAc $\beta$ 1-4GlcNAc                                                       | 4B  | <1 | <1 |
| GlcNAc $\beta$ 1-4GlcNAc $\beta$ 1-4GlcNAc $\beta$ 1-4GlcNAc                                     | 4C  | <1 | <1 |
| GlcNAc $\beta$ 1-4GlcNAc $\beta$ 1-4GlcNAc $\beta$ 1-4GlcNAc $\beta$ 1-4GlcNAc $\beta$ 1-4GlcNAc | 4D  | <1 | <1 |
| Bacterial cell wall muramyl disaccharide                                                         | 4E  | <1 | <1 |
| GlcNAc $\beta$ 1-4GlcNAc $\beta$ 1-4GlcNAc $\beta$ 1-4GlcNAc $\beta$ 1-4GlcNAc                   | 4F  | <1 | <1 |
| <b>Mannose</b>                                                                                   |     |    |    |
| Man $\alpha$ 1-2Man $\beta$ -sp4                                                                 | 119 | <1 | <1 |
| Man $\alpha$ 1-3Man $\beta$ -sp4                                                                 | 120 | <1 | <1 |
| Man $\alpha$ 1-4Man $\beta$ -sp4                                                                 | 121 | <1 | <1 |
| Man $\alpha$ 1-6Man $\beta$ -sp4                                                                 | 122 | <1 | <1 |
| Man $\beta$ 1-4GlcNAc $\beta$ -sp4                                                               | 123 | <1 | <1 |
| Man $\alpha$ 1-2Man $\alpha$ -sp4                                                                | 124 | <1 | <1 |
| Man $\alpha$ 1-3(Man $\alpha$ 1-6)Man $\beta$ -sp4                                               | 258 | <1 | <1 |
| Man $\alpha$ 1-3(Man $\alpha$ 1-3(Man $\alpha$ 1-6)Man $\alpha$ 1-6)Man $\beta$ -sp4             | 495 | <1 | <1 |
| GlcNAc $\beta$ 1-2Man                                                                            | 5A  | <1 | <1 |
| GlcNAc $\beta$ 1-2Man $\alpha$ 1-6(GlcNAc $\beta$ 1-2Man $\alpha$ 1-3)Man                        | 5B  | <1 | <1 |
| Man $\alpha$ 1-2Man                                                                              | 5C  | <1 | <1 |
| Man $\alpha$ 1-3Man                                                                              | 5D  | <1 | <1 |
| Man $\alpha$ 1-4Man                                                                              | 5E  | <1 | <1 |
| Man $\alpha$ 1-6Man                                                                              | 5F  | <1 | <1 |
| Man $\alpha$ 1-6(Man $\alpha$ 1-3)Man                                                            | 5G  | <1 | <1 |
| Man $\alpha$ 1-6(Man $\alpha$ 1-3)Man $\alpha$ 1-6(Man $\alpha$ 1-3)Man                          | 5H  | <1 | <1 |
| <b>Fucosylated</b>                                                                               |     |    |    |
| Fuc $\alpha$ 1-2Gal $\beta$ -sp3                                                                 | 71  | <1 | <1 |
| Fuc $\alpha$ 1-3GlcNAc $\beta$ -sp3                                                              | 72  | <1 | <1 |
| Fuc $\alpha$ 1-4GlcNAc $\beta$ -sp3                                                              | 73  | <1 | <1 |
| Fuc $\alpha$ 1-2Gal $\beta$ 1-3GlcNAc $\beta$ -sp3                                               | 215 | <1 | <1 |
| Fuc $\alpha$ 1-2Gal $\beta$ 1-4GlcNAc $\beta$ -sp3                                               | 216 | <1 | <1 |
| Fuc $\alpha$ 1-2Gal $\beta$ 1-3GalNAc $\alpha$ -sp3                                              | 217 | <1 | <1 |
| Fuc $\alpha$ 1-2Gal $\beta$ 1-4Glc $\beta$ -sp4                                                  | 219 | <1 | <1 |
| Fuc $\alpha$ 1-2(Gal $\alpha$ 1-3)Gal $\beta$ -sp3                                               | 226 | <1 | <1 |

|                                                                         |     |            |            |
|-------------------------------------------------------------------------|-----|------------|------------|
| Galβ1-3(Fuca1-4)GlcNAcβ-sp3                                             | 233 | <1         | <1         |
| Fuca1-3(Galβ1-4)GlcNAcβ-sp3                                             | 234 | <1         | <1         |
| Fuca1-2(GalNAcα1-3)Galβ-sp3                                             | 235 | <1         | <1         |
| 3-O-Su-Galβ1-3(Fuca1-4)GlcNAcβ-sp3                                      | 287 | <1         | <1         |
| Fuca1-3(3-O-Su-Galβ1-4)GlcNAcβ-sp3                                      | 288 | <1         | <1         |
| Fuca1-2(Galα1-3)Galβ1-3GlcNAcβ-sp3                                      | 359 | <1         | <1         |
| Fuca1-2(Galα1-3)Galβ1-4GlcNAcβ-sp3                                      | 360 | <1         | <1         |
| Fuca1-2(Galα1-3)Galβ1-3GalNAcα-sp3                                      | 362 | <1         | <1         |
| Fuca1-2(Galα1-3)Galβ1-3GalNAcβ-sp3                                      | 363 | <1         | <1         |
| Fuca1-3(Galα1-3Galβ1-4)GlcNAcβ-sp3                                      | 364 | <1         | <1         |
| Fuca1-2(GalNAcα1-3)Galβ1-3GlcNAcβ-sp3                                   | 366 | <1         | <1         |
| Fuca1-2(GalNAcα1-3)Galβ1-4GlcNAcβ-sp3                                   | 368 | <1         | <1         |
| Fuca1-2Galβ1-3(Fuca1-4)GlcNAcβ-sp3                                      | 371 | <1         | <1         |
| Fuca1-3(Fuca1-2Galβ1-4)GlcNAcβ-sp3                                      | 372 | <1         | <1         |
| Fuca1-2(GalNAcα1-3)Galβ1-3GalNAcα-sp3                                   | 392 | <1         | <1         |
| Fuca1-2Galβ1-3GlcNAcβ1-3Galβ1-4Glcβ-sp4                                 | 479 | <1         | <1         |
| Fuca1-2Galβ1-3GlcNAcβ1-3Galβ1-4GlcNAcβ-sp2                              | 480 | <1         | <1         |
| Fuca1-3(Fuca1-2 (Galα1-3)Galβ1-4)GlcNAcβ-sp3                            | 483 | <1         | <1         |
| Fuca1-2Galβ1-3(Fuca1-4)GlcNAcβ1-3Galβ1-4Glcβ-sp4                        | 496 | <1         | <1         |
| Fuca1-3(Fuca1-2Galβ1-4)GlcNAcβ1-3Galβ1-4Glcβ-sp4                        | 497 | <1         | <1         |
| Lex1-6'(Lec1-3')Lac-sp4                                                 | 538 | <1         | <1         |
| LacNAc1-6'(Led1-3')Lac-sp4                                              | 539 | <1         | <1         |
| Lex1-6'(Led1-3')Lac-sp4                                                 | 541 | <1         | <1         |
| LecLex1-6'(Lec1-3')Lac-sp4                                              | 542 | <1         | <1         |
| Lex1-6'(Leb1-3')Lac-sp4                                                 | 543 | <1         | <1         |
| Fuca1-2Galβ1-3GlcNAcβ1-3Galβ1-4Glc                                      | 7A  | <1         | 1.992±0.43 |
| Galβ1-3(Fuca1-4)GlcNAcβ1-3Galβ1-4Glc                                    | 7B  | <1         | <1         |
| Galβ1-4(Fuca1-3)GlcNAcβ1-3Galβ1-4Glc                                    | 7C  | <1         | <1         |
| Fuca1-2Galβ1-3(Fuca1-4)GlcNAcβ1-3Galβ1-4Glc                             | 7D  | <1         | <1         |
| Galβ1-3(Fuca1-4)GlcNAcβ1-3Galβ1-4(Fuca1-3)Glc                           | 7E  | <1         | <1         |
| Fuca1-2Gal                                                              | 7F  | <1         | <1         |
| Fuca1-2Galβ1-4Glc                                                       | 7G  | <1         | <1         |
| Galβ1-4(Fuca1-3)Glc                                                     | 7H  | <1         | <1         |
| Galβ1-4(Fuca1-3)GlcNAc                                                  | 7I  | <1         | <1         |
| Galβ1-3(Fuca1-4)GlcNAc                                                  | 7J  | <1         | <1         |
| GalNAcα1-3(Fuca1-2)Gal                                                  | 7K  | <1         | <1         |
| Fuca1-2Galβ1-4(Fuca1-3)Glc                                              | 7L  | <1         | <1         |
| Galβ1-3(Fuca1-2)Gal                                                     | 7M  | <1         | <1         |
| Fuca1-2Galβ1-4(Fuca1-3)GlcNAc                                           | 7N  | <1         | <1         |
| Fuca1-2Galβ1-3GlcNAc                                                    | 7O  | <1         | <1         |
| Fuca1-2Galβ1-3(Fuca1-4)GlcNAc                                           | 7P  | <1         | <1         |
| SO3-3Galβ1-3(Fuca1-4)GlcNAc                                             | 8A  | <1         | <1         |
| SO3-3Galβ1-4(Fuca1-3)GlcNAc                                             | 8B  | <1         | <1         |
| Galβ1-3GlcNAcβ1-3Galβ1-4(Fuca1-3)GlcNAcβ1-3Galβ1-4Glc                   | 8C  | <1         | <1         |
| Galβ1-4(Fuca1-3)GlcNAcβ1-6(Galβ1-3GlcNAcβ1-3)Galβ1-4Glc                 | 8D  | <1         | <1         |
| Galβ1-4(Fuca1-3)GlcNAcβ1-6(Fuca1-2Galβ1-3GlcNAcβ1-3)Galβ1-4Glc          | 8E  | <1         | <1         |
| Galβ1-4(Fuca1-3)GlcNAcβ1-6(Fuca1-2Galβ1-3(Fuca1-4)GlcNAcβ1-3)Galβ1-4Glc | 8F  | <1         | <1         |
| Galβ1-4GlcNAcβ1-3Galβ1-4(Fuca1-3)Glc                                    | 8G  | 4.877±0.33 | 3.611±0.49 |



|                                                                                  |     |    |            |
|----------------------------------------------------------------------------------|-----|----|------------|
| Fuca1-2Galβ1-4(Fuca1-3)GlcNAcβ1-3Galβ1-4Glc                                      | 8H  | <1 | <1         |
| Fuca1-3Galβ1-4GlcNAcβ1-3Galβ1-4(Fuca1-3)Glc                                      | 8I  | <1 | <1         |
| Fuca1-2Galb1-4(Fuca1-3)GlcNAcb1-3(Fuca1-2)Galb1-4Glc                             | 8J  | <1 | <1         |
| Galβ1-4(Fuca1-3)GlcNAcβ1-6(Galβ1-4GlcNAcβ1-3)Galβ1-4Glc                          | 8K  | <1 | <1         |
| Galb1-4(Fuca1-3)GlcNAcb1-6(Galb1-4(Fuca1-3)GlcNAcb1-3)Galb1-4Glc                 | 8L  | <1 | <1         |
| Fuca1-2Galb1-4(Fuca1-3)GlcNAcb1-6(Galb1-4GlcNAcb1-3)Galb1-4Glc                   | 8M  | <1 | <1         |
| Galb1-3GlcNAcb1-3Galb1-4(Fuca1-3)GlcNAcb1-6(Galb1-3GlcNAcb1-3)Galb1-4Glc         | 8N  | <1 | <1         |
| Fuca1-2Galβ1-3GlcNAcβ1-3Galβb1-4(Fuca1-3)GlcNAcβ1-6(Galβ1-3GlcNAcβ1-3)Galβ1-4Glc | 8O  | <1 | <1         |
| GalNAcb1-3(Fuca1-2)Galb1-4Glc                                                    | 8P  | <1 | <1         |
| Galb1-3(Fuca1-2)Galb1-4(Fuca1-3)Glc                                              | 9A  | <1 | <1         |
| Galβ1-4GlcNAcβ1-6(Fuca1-2Galβ1-3GlcNAcβ1-3)Galβ1-4Glc                            | 9B  | <1 | <1         |
| Galα1-3(Fuca1-2)Galβ1-4Glc                                                       | 18D | <1 | <1         |
| <b>Sialylated</b>                                                                |     |    |            |
| Neu5Aca2-3Galβ-sp3                                                               | 169 | <1 | <1         |
| Neu5Aca2-6Galβ-sp3                                                               | 170 | <1 | <1         |
| Neu5Aca2-3GalNAca-sp3                                                            | 171 | <1 | <1         |
| Neu5Aca2-6GalNAca-sp3                                                            | 172 | <1 | <1         |
| Neu5Gca2-6GalNAca-sp3                                                            | 174 | <1 | <1         |
| Neu5Aca2-8Neu5Aca2-sp3                                                           | 186 | <1 | <1         |
| Neu5Aca2-6GalNAcβ-sp3                                                            | 205 | <1 | <1         |
| Neu5Gca2-3Gal-sp3                                                                | 206 | <1 | <1         |
| Galα1-3(Neu5Aca2-6)GalNAca-sp3                                                   | 289 | <1 | <1         |
| Galβ1-3(Neu5Aca2-6)GalNAca-sp3                                                   | 290 | <1 | <1         |
| Neu5Aca2-3Galβ1-3GalNAca-sp3                                                     | 292 | <1 | <1         |
| Neu5Aca2-3Galβ1-4Glcβ-sp3                                                        | 293 | <1 | <1         |
| Neu5Aca2-3Galβ1-4Glcβ-sp4                                                        | 294 | <1 | <1         |
| Neu5Aca2-6Galβ1-4Glcβ-sp2                                                        | 295 | <1 | <1         |
| Neu5Aca2-3Galβ1-4GlcNAcβ-sp3                                                     | 298 | <1 | <1         |
| Neu5Aca2-3Galβ1-3GlcNAcβ-sp3                                                     | 299 | <1 | <1         |
| Neu5Aca2-6Galβ1-4GlcNAcβ-sp3                                                     | 300 | <1 | <1         |
| Neu5Gca2-3Galβ1-4GlcNAcβ-sp3                                                     | 303 | <1 | <1         |
| Neu5Gca2-6Galβ1-4GlcNAcβ-sp3                                                     | 304 | <1 | <1         |
| 9-Nac-Neu5Aca2-6Galβ1-4GlcNAcβ-sp3                                               | 306 | <1 | <1         |
| Neu5Aca2-3Galβ1-4-(6-O-Su)GlcNAcβ-sp3                                            | 315 | <1 | <1         |
| Neu5Aca2-3Galβ1-3-(6-O-Su)GalNAcβ-sp3                                            | 317 | <1 | <1         |
| Neu5Aca2-6Galβ1-4-(6-O-Su)GlcNAcβ-sp3                                            | 318 | <1 | <1         |
| Neu5Aca2-3-(6-O-Su)Galβ1-4GlcNAcβ-sp3                                            | 319 | <1 | 1.224±0.38 |
| (Neu5Aca2-8)3-sp3                                                                | 321 | <1 | <1         |
| Neu5Aca2-6Galβ1-3GlcNAc-sp3                                                      | 323 | <1 | <1         |
| Neu5Aca2-6Galβ1-3(6-O-Su)GlcNAc-sp3                                              | 324 | <1 | <1         |
| Neu5Gca2-3Galβ1-3GlcNAcβ-sp3                                                     | 331 | <1 | <1         |
| Neu5Aca2-3(GalNAcβ1-4)Galβ1-4Glcβ-sp2                                            | 421 | <1 | <1         |
| Neu5Aca2-3Galβ1-4GlcNAcβ1-3Galβ-sp3                                              | 422 | <1 | <1         |
| Fuca1-3(Neu5Aca2-3Galβ1-4)GlcNAcβ-sp3                                            | 423 | <1 | <1         |
| Neu5Aca2-3Galβ1-3(Fuca1-4)GlcNAcβ-sp3                                            | 426 | <1 | <1         |
| Fuca1-3(Neu5Aca2-3Galβ1-4)6-O-Su-GlcNAcβ-sp3                                     | 428 | <1 | <1         |

|                                                                   |     |            |            |
|-------------------------------------------------------------------|-----|------------|------------|
| Fuca1-3(Neu5Aca2-3(6-O-Su)Galβ1-4)GlcNAcβ-sp3                     | 429 | <1         | 6.012±1.14 |
| Neu5Aca2-3Galβ1-3(Neu5Aca2-6)GalNAcα-sp3                          | 433 | <1         | <1         |
| Neu5Aca2-8Neu5Aca2-3Galβ1-4Glcβ-sp4                               | 434 | <1         | <1         |
| Neu5Aca2-3Galβ1-4GlcNAcβ1-3Galβ1-4GlcNAcβ-sp2                     | 527 | <1         | <1         |
| Fuca1-3(Neu5Aca2-3 Galβ1-4)GlcNAcβ1-3Galβ-sp3                     | 528 | <1         | <1         |
| Neu5Aca2-6(Galβ1-3)GlcNAcβ1-3Galβ1-4Glcβ-sp4                      | 529 | <1         | <1         |
| GalNAcβ1-4(Neu5Aca2-8Neu5Aca2-3)Galβ1-4Glc-sp2                    | 531 | <1         | <1         |
| Neu5Aca2-8Neu5Aca2-8Neu5Aca2-3Galβ1-4Glc-sp2                      | 532 | <1         | 6.882±1.44 |
| (Neu5Aca2-8)2Neu5Aca2-3(GalNAcβ1-4)Galβ1-4Glc-sp2                 | 533 | <1         | <1         |
| Neu5Aca2-3Galβ1-4GlcNAcβ1-3Galβ1-4GlcNAcβ-sp3                     | 534 | <1         | <1         |
| Neu5Aca2-3Galβ1-3GlcNAcβ1-3Galβ1-4Glcβ-sp4                        | 536 | <1         | <1         |
| Neu5Aca2-3Galβ1-4GlcNAcβ1-3Galβ1-4Glcβ-sp4                        | 537 | <1         | <1         |
| Lex1-6'(6'SLN1-3')Lac-sp4                                         | 540 | <1         | <1         |
| Neu5Aca2-3Galβ1-3(Fuca1-4)GlcNAc                                  | 10A | <1         | 2.437±0.58 |
| Neu5Aca2-3Galβ1-4(Fuca1-3)GlcNAc                                  | 10B | 1.211±0.38 | <1         |
| Neu5Aca2-3Galβ1-3GlcNAcβ1-3Galβ1-4Glc                             | 10C | <1         | <1         |
| Galβ1-4(Fuca1-3)GlcNAcβ1-6(Neu5Aca2-6Galβ1-4GlcNAcβ1-3)Galβ1-4Glc | 10D | <1         | <1         |
| Neu5Aca2-3Galβ1-3(Neu5Aca2-6)GalNAc                               | 10E | <1         | <1         |
| Neu5Aca2-6Galβ1-3GlcNAcβ1-3Galβ1-4(Fuca1-3)Glc                    | 10H | 6.445±0.84 | <1         |
| Galβ1-3GlcNAcβ1-3(Neu5Aca2-6Galβ1-4GlcNAcβ1-6)Galβ1-4Glc          | 10I | <1         | <1         |
| Neu5Aca2-6Galβ1-3GlcNAcβ1-3(Galβ1-4GlcNAcβ1-6)Galβ1-4Glc          | 10J | <1         | <1         |
| Neu5Aca2-3Galβ1-4GlcNAc                                           | 10K | <1         | <1         |
| Neu5Aca2-6Galβ1-4GlcNAc                                           | 10L | <1         | <1         |
| Neu5Aca2-3Galβ1-3GlcNAcβ1-3Galβ1-4Glc                             | 10M | <1         | <1         |
| Galβ1-3(Neu5Aca2-6)GlcNAcβ1-3Galβ1-4Glc                           | 10N | <1         | <1         |
| Neu5Aca2-6Galβ1-4GlcNAcβ1-3Galβ1-4Glc                             | 10O | 1.291±0.64 | <1         |
| Neu5Aca2-3Galβ1-3(Neu5Aca2-6)GlcNAcβ1-3Galβ1-4Glc                 | 10P | <1         | <1         |
| Neu5Aca2-3Galβ1-4Glc                                              | 11A | <1         | <1         |
| Neu5Aca2-6Galβ1-4Glc                                              | 11B | <1         | <1         |
| (Neu5Aca2-8Neu5Ac)n (n<50)                                        | 11C | <1         | <1         |
| <b>Glucose</b>                                                    |     |            |            |
| Glcα1-4Glcβ-sp3                                                   | 110 | <1         | <1         |
| Glcβ1-4Glcβ-sp4                                                   | 111 | <1         | <1         |
| Glcβ1-6Glcβ-sp4                                                   | 112 | <1         | <1         |
| GlcAβ1-3GlcNAcβ-sp3                                               | 164 | <1         | <1         |
| GlcAβ1-3Galβ-sp3                                                  | 165 | <1         | <1         |
| GlcAβ1-6Galβ-sp3                                                  | 166 | <1         | <1         |
| (Glcα1-4)3β-sp4                                                   | 240 | <1         | <1         |
| (Glcα1-6)3β-sp4                                                   | 241 | <1         | <1         |
| (Glcα1-4)4β-sp4                                                   | 390 | <1         | <1         |
| (Glcα1-6)4β-sp4                                                   | 391 | <1         | <1         |
| (Glcα1-6)5β-sp4                                                   | 492 | <1         | <1         |
| (Glcα1-6)6β-sp4                                                   | 502 | <1         | <1         |
| GlcA                                                              | 18I | <1         | <1         |
| 6-O-(H2PO4)-Glc                                                   | 18J | <1         | <1         |
| Glcα1-4Glcα1-4                                                    | 19O | <1         | <1         |
| Glcα1-4Glcα1-4Glcα1-4                                             | 19P | <1         | <1         |
| <b>LMW GAGs</b>                                                   |     |            |            |
| Neocarratetraose-41, 3-di-O-sulphate (Na <sup>+</sup> )           | 12A | <1         | <1         |

|                                                                                    |     |    |    |
|------------------------------------------------------------------------------------|-----|----|----|
| Neocarratetraose-41-O-sulphate (Na <sup>+</sup> )                                  | 12B | <1 | <1 |
| Neocarrahexaose-24,41, 3, 5-tetra-O-sulphate (Na <sup>+</sup> )                    | 12C | <1 | <1 |
| Neocarrahexaose-41, 3, 5-tri-O-sulphate (Na <sup>+</sup> )                         | 12D | <1 | <1 |
| Neocarraoctaose-41, 3, 5, 7-tetra-O-sulphate (Na <sup>+</sup> )                    | 12E | <1 | <1 |
| Neocarradecaose-41, 3, 5, 7, 9-penta-O-sulphate (Na <sup>+</sup> )                 | 12F | <1 | <1 |
| ΔUA-2S-GlcNS-6S                                                                    | 12G | <1 | <1 |
| ΔUA-GlcNS-6S                                                                       | 12H | <1 | <1 |
| ΔUA-2S-GlcNS                                                                       | 12I | <1 | <1 |
| ΔUA-2S-GlcNAc-6S                                                                   | 12J | <1 | <1 |
| ΔUA-GlcNAc-6S                                                                      | 12K | <1 | <1 |
| ΔUA-2S-GlcNAc                                                                      | 12L | <1 | <1 |
| ΔUA-GlcNAc                                                                         | 12M | <1 | <1 |
| ΔUA-GalNAc-4S (Delta Di-4S)                                                        | 12N | <1 | <1 |
| ΔUA-GalNAc-6S (Delta Di-6S)                                                        | 12O | <1 | <1 |
| ΔUA-GalNAc-4S,6S (Delta Di-disE)                                                   | 12P | <1 | <1 |
| ΔUA-2S-GalNAc-4S (Delta Di-disB)                                                   | 13A | <1 | <1 |
| ΔUA-2S-GalNAc-6S (Delta Di-disD)                                                   | 13B | <1 | <1 |
| ΔUA-2S-GalNAc-4S-6S (Delta Di-tisS)                                                | 13C | <1 | <1 |
| ΔUA-2S-GalNAc-6S (Delta Di-UA2S)                                                   | 13D | <1 | <1 |
| ΔUA-GlcNAc (Delta Di-HA)                                                           | 13E | <1 | <1 |
| ΔUA→2S-GlcN-6S                                                                     | 14M | <1 | <1 |
| ΔUA→GlcN-6S                                                                        | 14N | <1 | <1 |
| ΔUA→2S-GlcN                                                                        | 14O | <1 | <1 |
| ΔUA→GlcN                                                                           | 14P | <1 | <1 |
| <b>HMW GAGs</b>                                                                    |     |    |    |
| (GlcAβ1-4GlcNAcβ1-3) <sub>8</sub> -NH <sub>2</sub> -ol                             | 625 | <1 | <1 |
| (GlcAβ1-3GlcNAcβ1-4) <sub>n</sub> (n=4)                                            | 13F | <1 | <1 |
| (GlcAβ1-3GlcNAcβ1-4) <sub>n</sub> (n=8)                                            | 13G | <1 | <1 |
| (GlcAβ1-3GlcNAcβ1-4) <sub>n</sub> (n=10)                                           | 13H | <1 | <1 |
| (GlcAβ1-3GlcNAcβ1-4) <sub>n</sub> (n=12)                                           | 13I | <1 | <1 |
| (GlcA/IdoAα/β1-4GlcNAcα1-4) <sub>n</sub> (n=200)                                   | 13J | <1 | <1 |
| (GlcA/IdoAβ1-3(±4/6S)GalNAcβ1-4) <sub>n</sub> (n<250)                              | 13K | <1 | <1 |
| ((±2S)GlcA/IdoAα/b1-3(±4S)GalNAcβ1-4) <sub>n</sub> (n<250)                         | 13L | <1 | <1 |
| (GlcA/IdoAβ1-3(±6S)GalNAcβ1-4) <sub>n</sub> (n<250)                                | 13M | <1 | <1 |
| HA - 4 10mM                                                                        | 13N | <1 | <1 |
| HA - 6 10mM                                                                        | 13O | <1 | <1 |
| HA - 8 9.7mM                                                                       | 13P | <1 | <1 |
| HA 10 7.83mM                                                                       | 14A | <1 | <1 |
| HA-12 6.5mM                                                                        | 14B | <1 | <1 |
| HA-14 5.6mM                                                                        | 14C | <1 | <1 |
| HA-16 4.9mM                                                                        | 14D | <1 | <1 |
| HA 30000 da 2.5mg/ml                                                               | 14E | <1 | <1 |
| HA 107000 da 2.5mg/ml                                                              | 14F | <1 | <1 |
| HA 190000 da 2.5 mg/ml                                                             | 14G | <1 | <1 |
| HA 220000 da 2.5 mg/ml                                                             | 14H | <1 | <1 |
| HA 1600000 da 2.5 mg/ml                                                            | 14I | <1 | <1 |
| Heparin sulfate 5 mg/ml                                                            | 14J | <1 | <1 |
| β1-3Glucan                                                                         | 14K | <1 | <1 |
| <b>Complex N-glycans</b>                                                           |     |    |    |
| (Sia2-6A-GN-M) <sub>2</sub> -3,6-M-GN-GNβ-sp4                                      | 627 | <1 | <1 |
| Galβ1-4GlcNAcβ1-2Manα1-3(Galβ1-4GlcNAcβ1-2Manα1-6Man)β1-4GlcNAcβ1-4(Fuca1-6)GlcNAc | 19A | <1 | <1 |

|                                                                                                                            |     |    |    |
|----------------------------------------------------------------------------------------------------------------------------|-----|----|----|
| Galβ1-4GlcNAcβ1-2(Galβ1-4GlcNAcβ1-4)Manα1-3(Galβ1-4GlcNAcβ1-2(Galβ1-4GlcNAcβ1-6)Manα1-6Man)β1-4GlcNAcβ1-4GlcNAc            | 19B | <1 | <1 |
| Neu5Acα2-6Galβ1-4GlcNAcβ1-2Manα1-3(Galβ1-4GlcNAcβ1-2Manα1-6)Manβ1-4GlcNAcβ1-4GlcNAc                                        | 19C | <1 | <1 |
| Neu5Acα2-6Galβ1-4GlcNAcβ1-2Manα1-3(Neu5Acα2-6Galβ1-4GlcNAcβ1-2Manα1-6)Manβ1-4GlcNAcβ1-4GlcNAc                              | 19D | <1 | <1 |
| Galβ1-4GlcNAcβ1-2Manα1-3(Galβ1-4GlcNAcβ1-2Manα1-6)Manβ1-4GlcNAcβ1-4GlcNAc                                                  | 19E | <1 | <1 |
| Neu5Acα2-6Galβ1-4GlcNAcβ1-2Manα1-3(Neu5Acα2-6Galβ1-4GlcNAcβ1-2Manα1-6)Manβ1-4GlcNAcβ1-4(Fuca1-6)GlcNAc                     | 19F | <1 | <1 |
| Neu5Acα2-6Galβ1-4GlcNAcβ1-2(Neu5Acα2-6Galβ1-4GlcNAcβ1-4)Manα1-3(Neu5Acα2-6Galβ1-4GlcNAcβ1-2Manα1-6)Manβ1-4GlcNAcβ1-4GlcNAc | 19G | <1 | <1 |
| GlcNAcβ1-2(GlcNAcβ1-4)Manα1-3(GlcNAcβ1-2Manα1-6)GlcNAcβ1-4Manβ1-4GlcNAcβ1-4GlcNAc                                          | 19H | <1 | <1 |

395

396 Red indicates binding as shown in Fig 5. Binding indicates a value of greater than 1-fold of average  
 397 background plus 3 standard deviations as described in the MIRAGE table (Table F).

398

**Table F. Supplementary glycan microarray document based on MIRAGE guidelines DOI: 10.1093/glycob/cww118.**

| Classification                           | Guidelines                                                                                                                                                                                                                                                                       |
|------------------------------------------|----------------------------------------------------------------------------------------------------------------------------------------------------------------------------------------------------------------------------------------------------------------------------------|
| <b>1. Sample: Glycan Binding Sample</b>  |                                                                                                                                                                                                                                                                                  |
| Description of Sample                    | <p><u>Sample names:</u><br/>Uc1D<sup>LD</sup> and UcaD<sup>LD</sup></p> <p><u>Origin:</u> Produced as a recombinant protein in <i>E. coli</i>.</p> <p><u>Method of preparation:</u><br/>The preparation of Uc1D and UcaD are explained in the Materials and Methods section.</p> |
| Sample modifications                     | Uc1D <sup>LD</sup> and UcaD <sup>LD</sup> are His-Tagged proteins.                                                                                                                                                                                                               |
| Assay protocol                           | See <i>Materials and Methods</i> .                                                                                                                                                                                                                                               |
| <b>2. Glycan Library</b>                 |                                                                                                                                                                                                                                                                                  |
| Glycan description for defined glycans   | Glycans in this study are listed in Table E in S1 Text and as a published library in doi: 10.1371/journal.pntd.0004120.                                                                                                                                                          |
| Glycan description for undefined glycans | N/A.                                                                                                                                                                                                                                                                             |
| Glycan modifications                     | <p>Glycans were prepared in one of two ways for printing:</p> <p>1. Glycans (with IDs in number/letter format; e.g. 1A, 4C, 7K) were sourced commercially from Dextra Laboratories, Elicityl and Carbosynth and were</p>                                                         |

|                                                    |                                                                                                                                                                                                                                                                                                                                                                     |
|----------------------------------------------------|---------------------------------------------------------------------------------------------------------------------------------------------------------------------------------------------------------------------------------------------------------------------------------------------------------------------------------------------------------------------|
|                                                    | <p>made into glycoamines using the protocol published in Day et al 2009 (doi: 10.1371/journal.pone.0004927).</p> <p>2. Glycans (with IDs in number only format) were obtained from Prof Nicolai Bovin and were modified with spacers as per DOI: 10.1073/pnas.0407902101. The library of these glycans was first published in DOI: 10.1016/j.molimm.2009.06.010</p> |
| <b>3. Printing Surface; e.g., Microarray Slide</b> |                                                                                                                                                                                                                                                                                                                                                                     |
| Description of surface                             | Epoxy activated glass microarray slides.                                                                                                                                                                                                                                                                                                                            |
| Manufacturer                                       | ArrayIt SuperEpoxy 3 (SME3).                                                                                                                                                                                                                                                                                                                                        |
| Custom preparation of surface                      | N/A.                                                                                                                                                                                                                                                                                                                                                                |
| Non-covalent Immobilisation                        | N/A.                                                                                                                                                                                                                                                                                                                                                                |
| <b>4. Arrayer (Printer)</b>                        |                                                                                                                                                                                                                                                                                                                                                                     |
| Description of Arrayer                             | SpotBot® Extreme Protein Microarray Spotter (ArrayIt, California, USA).                                                                                                                                                                                                                                                                                             |
| Dispensing mechanism                               | Contact printing using 946NS6 pins with a 6 pin in a 3 columns x 2 rows configuration.                                                                                                                                                                                                                                                                              |
| Glycan deposition                                  | Approximately 1.8 nl per spot is printed according to manufactures guidelines. Glycan were at 500 µM in 50:50 DMF:DMSO.                                                                                                                                                                                                                                             |
| Printing conditions                                | Array were printed with dehumidification at a maximum humidity of 60% relative humidity (Standard laboratory starting humidity of 75-90%) at 22°C. Glycans were left to react with the slide for at least 8 hours after the print was completed.                                                                                                                    |

| <b>5. Glycan Microarray with “Map”</b>        |                                                                                                                                                                                                                                                                                                                                                                                                                                                                                                                                                                                                                                                                                                                                                                                                                      |
|-----------------------------------------------|----------------------------------------------------------------------------------------------------------------------------------------------------------------------------------------------------------------------------------------------------------------------------------------------------------------------------------------------------------------------------------------------------------------------------------------------------------------------------------------------------------------------------------------------------------------------------------------------------------------------------------------------------------------------------------------------------------------------------------------------------------------------------------------------------------------------|
| Array layout                                  | The array consists of a single array of glycans split between 6 pins (3 columns x 2 rows) with 4500µm row and column spacing. Each pin printed a 20 columns x 16 rows with 200µm spot spacing (centre to centre) with a minimum spot size of 100µm. Each sample is printed in quadruplicate with each of the 6 print areas including at least three negative control samples (print solution only) and two positive control samples consisting of one sample of fluorosciename and one sample of a mixture of rabbit anti-mouse antibody labelled with Alexa 555 and Alexa 647. Positive controls provide proof of successful immobilization of the amine reagents and provides for orientation for analysis. The antibodies also can provide controls for secondary antibodies used in experiments (if applicable). |
| Glycan identification and quality control     | Arrays are quality controlled by a range of measures. 1. Each printed array is post print scanned to confirm deposition of the glycans on the array surface prior to neutralization of the remaining slide surface. 2. Post neutralized slides are scanned again to monitor for remaining autofluorescence. 3. Slides are assayed with fluorescently labeled lectins: WGA-Texas Red (EY Laboratories) and ConA-FITC (EY Laboratories).                                                                                                                                                                                                                                                                                                                                                                               |
| <b>6. Detector and Data Processing</b>        |                                                                                                                                                                                                                                                                                                                                                                                                                                                                                                                                                                                                                                                                                                                                                                                                                      |
| Scanning hardware                             | ProScanArray 4 laser (488 nM, 532 nM, 595 nM, 647 nM) scanner (Perkin Elmer).                                                                                                                                                                                                                                                                                                                                                                                                                                                                                                                                                                                                                                                                                                                                        |
| Scanner settings                              | Scanning resolution: 10µM<br>Laser channel: 532nM excitation / emission filter.<br>PMT: 70% gain<br>Scan powers: 100% laser power.                                                                                                                                                                                                                                                                                                                                                                                                                                                                                                                                                                                                                                                                                   |
| Image analysis software                       | ScanArray Express (Perkin Elmer).                                                                                                                                                                                                                                                                                                                                                                                                                                                                                                                                                                                                                                                                                                                                                                                    |
| Data processing                               | Data was exported as a CSV file and exported to Microsoft Excel.                                                                                                                                                                                                                                                                                                                                                                                                                                                                                                                                                                                                                                                                                                                                                     |
| <b>7. Glycan Microarray Data Presentation</b> |                                                                                                                                                                                                                                                                                                                                                                                                                                                                                                                                                                                                                                                                                                                                                                                                                      |

|                                                              |                                                                                                                                                                                                                                                                                                                                                                                                                                                                                                                     |
|--------------------------------------------------------------|---------------------------------------------------------------------------------------------------------------------------------------------------------------------------------------------------------------------------------------------------------------------------------------------------------------------------------------------------------------------------------------------------------------------------------------------------------------------------------------------------------------------|
| Data presentation                                            | Binding data is presented in Fig 5 together with SPR data. The yes/no binding including glycan identification is shown in Table E in S1 Text.                                                                                                                                                                                                                                                                                                                                                                       |
| <b>8. Interpretation and Conclusion from Microarray Data</b> |                                                                                                                                                                                                                                                                                                                                                                                                                                                                                                                     |
| Data interpretation                                          | We only use glycan arrays as a yes/no binding tool. Due to this we look only at binding that is unambiguously above background vs lack of binding above background. Average background + 3x standard deviation of the background of 20 sets of 4 spots of DMF:DMSO only spots is applied to determine if binding observed is significantly above background. Only spots with values equal to or greater than this value were considered as binding from data of any tested slide. These values are slide dependent. |
| Conclusions                                                  | UcaD <sup>LD</sup> and UclD <sup>LD</sup> both recognize glycans but even though they are highly similar the glycans recognized are different.                                                                                                                                                                                                                                                                                                                                                                      |

401

402

403



## 404 **Supplementary Section References**

405

- 406 1. Zhou Z, Alikhan NF, Mohamed K, Fan Y, Agama Study G, Achtman M. The EnteroBase  
407 user's guide, with case studies on Salmonella transmissions, Yersinia pestis phylogeny, and  
408 Escherichia core genomic diversity. *Genome research*. 2020;30(1):138-52. doi:  
409 10.1101/gr.251678.119. PubMed PMID: 31809257.
- 410 2. Sievers F, Higgins DG. Clustal Omega for making accurate alignments of many protein  
411 sequences. *Protein science : a publication of the Protein Society*. 2018;27(1):135-45. doi:  
412 10.1002/pro.3290. PubMed PMID: 28884485; PubMed Central PMCID: PMC5734385.
- 413 3. Kalyaanamoorthy S, Minh BQ, Wong TKF, von Haeseler A, Jermiin LS. ModelFinder: fast  
414 model selection for accurate phylogenetic estimates. *Nature methods*. 2017;14(6):587-9. doi:  
415 10.1038/nmeth.4285. PubMed PMID: 28481363; PubMed Central PMCID: PMC5453245.
- 416 4. Zhang H, Gao S, Lercher MJ, Hu S, Chen WH. EvolView, an online tool for visualizing,  
417 annotating and managing phylogenetic trees. *Nucleic acids research*. 2012;40(Web Server  
418 issue):W569-72. doi: 10.1093/nar/gks576. PubMed PMID: 22695796; PubMed Central PMCID:  
419 PMC3394307.
- 420 5. Datsenko KA, Wanner BL. One-step inactivation of chromosomal genes in Escherichia coli  
421 K-12 using PCR products. *Proceedings of the National Academy of Sciences of the United States of*  
422 *America*. 2000;97(12):6640-5. Epub 2000/06/01. doi: 10.1073/pnas.120163297. PubMed PMID:  
423 10829079; PubMed Central PMCID: PMC18686.
- 424 6. Totsika M, Beatson SA, Sarkar S, Phan MD, Petty NK, Bachmann N, et al. Insights into a  
425 multidrug resistant Escherichia coli pathogen of the globally disseminated ST131 lineage: genome  
426 analysis and virulence mechanisms. *PLoS One*. 2011;6(10):e26578. doi:  
427 10.1371/journal.pone.0026578. PubMed PMID: 22053197; PubMed Central PMCID:  
428 PMC3203889.
- 429 7. Nyerges A, Csorgo B, Nagy I, Balint B, Bihari P, Lazar V, et al. A highly precise and portable  
430 genome engineering method allows comparison of mutational effects across bacterial species.  
431 *Proceedings of the National Academy of Sciences of the United States of America*.  
432 2016;113(9):2502-7. doi: 10.1073/pnas.1520040113. PubMed PMID: 26884157; PubMed Central  
433 PMCID: PMC4780621.
- 434 8. Ulett GC, Webb RI, Schembri MA. Antigen-43-mediated autoaggregation impairs motility in  
435 Escherichia coli. *Microbiology*. 2006;152(Pt 7):2101-10. doi: 10.1099/mic.0.28607-0. PubMed  
436 PMID: 16804184.
- 437 9. Miller JH. A short course in bacterial genetics: a laboratory manual and handbook for  
438 Escherichia coli and related bacteria. Plainview, N.Y: Cold Spring Harbor Laboratory Press; 1992.
- 439 10. Rapid amplification of 5' complementary DNA ends (5' RACE). *Nature methods*.  
440 2005;2(8):629-30. Epub 2005/09/09. PubMed PMID: 16145794.

- 441 11. Spaulding CN, Klein RD, Ruer S, Kau AL, Schreiber HL, Cusumano ZT, et al. Selective  
442 depletion of uropathogenic *E. coli* from the gut by a FimH antagonist. *Nature*. 2017;546(7659):528-  
443 32. Epub 2017/06/15. doi: 10.1038/nature22972. PubMed PMID: 28614296; PubMed Central  
444 PMCID: PMC5654549.
- 445 12. Russell CW, Fleming BA, Jost CA, Tran A, Stenquist AT, Wambaugh MA, et al. Context-  
446 Dependent Requirements for FimH and Other Canonical Virulence Factors in Gut Colonization by  
447 Extraintestinal Pathogenic *Escherichia coli*. *Infection and immunity*. 2018;86(3). doi:  
448 10.1128/IAI.00746-17. PubMed PMID: 29311232; PubMed Central PMCID: PMC5820936.
- 449 13. Kelley LA, Sternberg MJ. Protein structure prediction on the Web: a case study using the  
450 Phyre server. *Nature Protocols*. 2009;4(3):363-71. doi: 10.1038/nprot.2009.2. PubMed PMID:  
451 19247286.
- 452 14. Furlong EJ, Lo AW, Kurth F, Premkumar L, Totsika M, Achard MES, et al. A shape-shifting  
453 redox foldase contributes to *Proteus mirabilis* copper resistance. *Nature communications*.  
454 2017;8:16065. doi: 10.1038/ncomms16065. PubMed PMID: 28722010; PubMed Central PMCID:  
455 PMC5524982.
- 456 15. Shewell LK, Day CJ, Jen FE, Haselhorst T, Atack JM, Reijneveld JF, et al. All major  
457 cholesterol-dependent cytolysins use glycans as cellular receptors. *Science advances*.  
458 2020;6(21):eaaz4926. doi: 10.1126/sciadv.aaz4926. PubMed PMID: 32494740; PubMed Central  
459 PMCID: PMC7244308.
- 460 16. Waespy M, Gbem TT, Elenschneider L, Jeck AP, Day CJ, Hartley-Tassell L, et al.  
461 Carbohydrate Recognition Specificity of Trans-sialidase Lectin Domain from *Trypanosoma*  
462 *congolense*. *PLoS neglected tropical diseases*. 2015;9(10):e0004120. doi:  
463 10.1371/journal.pntd.0004120. PubMed PMID: 26474304; PubMed Central PMCID: PMC4608562.
- 464 17. McPhillips TM, McPhillips SE, Chiu HJ, Cohen AE, Deacon AM, Ellis PJ, et al. Blu-Ice and  
465 the distributed control system: software for data acquisition and instrument control at macromolecular  
466 crystallography beamlines. *J Synchrotron Radiat*. 2002;9(Pt 6):401-6. Epub 2002/11/01. PubMed  
467 PMID: 12409628.
- 468 18. Winn MD, Ballard CC, Cowtan KD, Dodson EJ, Emsley P, Evans PR, et al. Overview of the  
469 CCP4 suite and current developments. *Acta Crystallographica Section D*. 2011;67(Pt 4):235-42.  
470 Epub 2011/04/05. doi: 10.1107/S0907444910045749. PubMed PMID: 21460441; PubMed Central  
471 PMCID: PMC3069738.
- 472 19. Pannu NS, Waterreus WJ, Skubak P, Sikharulidze I, Abrahams JP, de Graaff RA. Recent  
473 advances in the CRANK software suite for experimental phasing. *Acta Crystallographica Section D*.  
474 2011;67(Pt 4):331-7. doi: 10.1107/S0907444910052224. PubMed PMID: 21460451; PubMed  
475 Central PMCID: PMC5654549.
- 476 20. Sheldrick GM. A short history of SHELX. *Acta Crystallographica Section A*. 2008;64(Pt  
477 1):112-22. doi: 10.1107/S0108767307043930. PubMed PMID: 18156677.
- 478 21. Cowtan K. The Buccaneer software for automated model building. 1. Tracing protein chains.  
479 *Acta Crystallographica Section D*. 2006;62(Pt 9):1002-11. doi: 10.1107/S0907444906022116.  
480 PubMed PMID: 16929101.

- 481 22. Murshudov GN, Skubak P, Lebedev AA, Pannu NS, Steiner RA, Nicholls RA, et al.  
482 REFMAC5 for the refinement of macromolecular crystal structures. *Acta Crystallographica Section*  
483 *D*. 2011;67(Pt 4):355-67. doi: 10.1107/S0907444911001314. PubMed PMID: 21460454; PubMed  
484 Central PMCID: PMCPMC3069751.
- 485 23. McCoy AJ. Solving structures of protein complexes by molecular replacement with Phaser.  
486 *Acta Crystallographica Section D*. 2007;63(Pt 1):32-41. Epub 2006/12/14. doi:  
487 10.1107/S0907444906045975. PubMed PMID: 17164524; PubMed Central PMCID:  
488 PMCPMC2483468.
- 489 24. Adams PD, Baker D, Brunger AT, Das R, DiMaio F, Read RJ, et al. Advances, interactions,  
490 and future developments in the CNS, Phenix, and Rosetta structural biology software systems. *Annual*  
491 *review of biophysics*. 2013;42:265-87. doi: 10.1146/annurev-biophys-083012-130253. PubMed  
492 PMID: 23451892.
- 493 25. Emsley P, Lohkamp B, Scott WG, Cowtan K. Features and development of Coot. *Acta*  
494 *Crystallographica Section D*. 2010;66(Pt 4):486-501. PubMed PMID: 20383002; PubMed Central  
495 PMCID: PMC2852313.
- 496 26. Chen VB, Arendall WB, 3rd, Headd JJ, Keedy DA, Immormino RM, Kapral GJ, et al.  
497 MolProbity: all-atom structure validation for macromolecular crystallography. *Acta*  
498 *Crystallographica Section D*. 2010;66(Pt 1):12-21. Epub 2010/01/09. doi:  
499 10.1107/S0907444909042073. PubMed PMID: 20057044; PubMed Central PMCID: PMC2803126.
- 500 27. Kabsch W. XDS. *Acta Crystallographica Section D*. 2010;66(Pt 2):125-32. Epub 2010/02/04.  
501 doi: 10.1107/S0907444909047337. PubMed PMID: 20124692; PubMed Central PMCID:  
502 PMC2815665.
- 503 28. Trott O, Olson AJ. AutoDock Vina: improving the speed and accuracy of docking with a new  
504 scoring function, efficient optimization, and multithreading. *Journal of computational chemistry*.  
505 2010;31(2):455-61. doi: 10.1002/jcc.21334. PubMed PMID: 19499576; PubMed Central PMCID:  
506 PMC3041641.
- 507 29. Krieger E, Koraimann G, Vriend G. Increasing the precision of comparative models with  
508 YASARA NOVA--a self-parameterizing force field. *Proteins*. 2002;47(3):393-402. PubMed PMID:  
509 11948792.
- 510 30. Kjaergaard K, Schembri MA, Ramos C, Molin S, Klemm P. Antigen 43 facilitates formation  
511 of multispecies biofilms. *Environ Microbiol*. 2000;2(6):695-702. doi: 10.1046/j.1462-  
512 2920.2000.00152.x. PubMed PMID: 11214802.
- 513 31. Rasko DA, Rosovitz MJ, Myers GS, Mongodin EF, Fricke WF, Gajer P, et al. The pangenome  
514 structure of *Escherichia coli*: comparative genomic analysis of *E. coli* commensal and pathogenic  
515 isolates. *J Bacteriol*. 2008;190(20):6881-93. Epub 20080801. doi: 10.1128/JB.00619-08. PubMed  
516 PMID: 18676672; PubMed Central PMCID: PMCPMC2566221.
- 517 32. Stapleton A, Moseley S, Stamm WE. Urovirulence determinants in *Escherichia coli* isolates  
518 causing first-episode and recurrent cystitis in women. *J Infect Dis*. 1991;163(4):773-9. doi:  
519 10.1093/infdis/163.4.773. PubMed PMID: 1672702.
- 520 33. Chen SL, Hung CS, Xu J, Reigstad CS, Magrini V, Sabo A, et al. Identification of genes  
521 subject to positive selection in uropathogenic strains of *Escherichia coli*: a comparative genomics

- 522 approach. Proc Natl Acad Sci U S A. 2006;103(15):5977-82. Epub 20060403. doi:  
523 10.1073/pnas.0600938103. PubMed PMID: 16585510; PubMed Central PMCID:  
524 PMCPMC1424661.
- 525 34. Mulvey MA, Schilling JD, Hultgren SJ. Establishment of a persistent *Escherichia coli*  
526 reservoir during the acute phase of a bladder infection. Infect Immun. 2001;69(7):4572-9. doi:  
527 10.1128/IAI.69.7.4572-4579.2001. PubMed PMID: 11402001; PubMed Central PMCID:  
528 PMCPMC98534.
- 529 35. Petty NK, Ben Zakour NL, Stanton-Cook M, Skippington E, Totsika M, Forde BM, et al.  
530 Global dissemination of a multidrug resistant *Escherichia coli* clone. Proc Natl Acad Sci USA.  
531 2014;111(15):5694-9. doi: 10.1073/pnas.1322678111. PubMed PMID: 24706808; PubMed Central  
532 PMCID: PMC3992628.
- 533 36. Furlong EJ, Lo AW, Kurth F, Premkumar L, Totsika M, Achard MES, et al. A shape-shifting  
534 redox foldase contributes to *Proteus mirabilis* copper resistance. Nat Commun. 2017;8:16065. Epub  
535 2017/07/20. doi: 10.1038/ncomms16065. PubMed PMID: 28722010; PubMed Central PMCID:  
536 PMCPMC5524982.
- 537 37. Datsenko KA, Wanner BL. One-step inactivation of chromosomal genes in *Escherichia coli*  
538 K-12 using PCR products. Proc Natl Acad Sci U S A. 2000;97(12):6640-5. doi:  
539 10.1073/pnas.120163297. PubMed PMID: 10829079; PubMed Central PMCID: PMCPMC18686.
- 540 38. Martinez E, Bartolome B, de la Cruz F. pACYC184-derived cloning vectors containing the  
541 multiple cloning site and lacZ alpha reporter gene of pUC8/9 and pUC18/19 plasmids. Gene.  
542 1988;68(1):159-62. doi: 10.1016/0378-1119(88)90608-7. PubMed PMID: 2851489.
- 543 39. Farinha MA, Kropinski AM. Construction of broad-host-range plasmid vectors for easy  
544 visible selection and analysis of promoters. J Bacteriol. 1990;172(6):3496-9. doi:  
545 10.1128/jb.172.6.3496-3499.1990. PubMed PMID: 2111810; PubMed Central PMCID:  
546 PMCPMC209165.
- 547 40. Guzman LM, Belin D, Carson MJ, Beckwith J. Tight regulation, modulation, and high-level  
548 expression by vectors containing the arabinose PBAD promoter. J Bacteriol. 1995;177(14):4121-30.  
549 doi: 10.1128/jb.177.14.4121-4130.1995. PubMed PMID: 7608087; PubMed Central PMCID:  
550 PMCPMC177145.
- 551 41. Schembri MA, Hjerrild L, Gjermansen M, Klemm P. Differential expression of the  
552 *Escherichia coli* autoaggregation factor antigen 43. J Bacteriol. 2003;185(7):2236-42. Epub  
553 2003/03/20. doi: 10.1128/jb.185.7.2236-2242.2003. PubMed PMID: 12644494; PubMed Central  
554 PMCID: PMCPMC151503.
- 555 42. Evans PR, Murshudov GN. How good are my data and what is the resolution? Acta  
556 Crystallogr D Biol Crystallogr. 2013;69(Pt 7):1204-14. doi: 10.1107/S0907444913000061. PubMed  
557 PMID: 23793146; PubMed Central PMCID: PMCPMC3689523.

558
